# Supplementary material for: Carboxonium derivatives based on closo-dodecaborate anions [1,2-B12H10O2CR]−: synthesis and molecular orbital analysis
Source: Royal Society of Chemistry journal article supplement (doi:10.1039/d4nj01048e), 2024-01-01
Supplement: d4nj01048e1.pdf [file d4nj01048e1.pdf]

**Carboxonium Derivatives Based on *Closo*-Dodecaborate Anion [1,2- $B_{12}H_{10}O_2CR]^-$ ,  $R=CH_3, C_2H_5, C_3H_7, C_6H_5$ : Synthesis and Molecular Orbital Analysis**

Anastasia V. Kolbunova<sup>a</sup>, Ilya N. Klyukin<sup>a\*</sup>, Alexander S. Novikov<sup>b\*</sup>, Alexey V. Nelyubin<sup>a</sup>,  
Andrey P. Zhdanov<sup>a</sup>, Alexey S. Kubasov<sup>a</sup>, Nikita A. Selivanov<sup>a</sup>, Alexander Yu. Bykov<sup>a</sup>,  
Konstantin Yu. Zhizhin<sup>a</sup> and Nikolay T. Kuznetsov<sup>a</sup>

<sup>a</sup> *Kurnakov Institute of General and Inorganic Chemistry,  
Russian Academy of Sciences,  
Leninskii pr. 31, 117907, Moscow, Russian Federation*

<sup>b</sup> *Saint Petersburg State University, Institute of Chemistry,  
Universitetskaya Nab. 7-9, 199034, Saint Petersburg, Russian Federation*

## 1. Experimental data

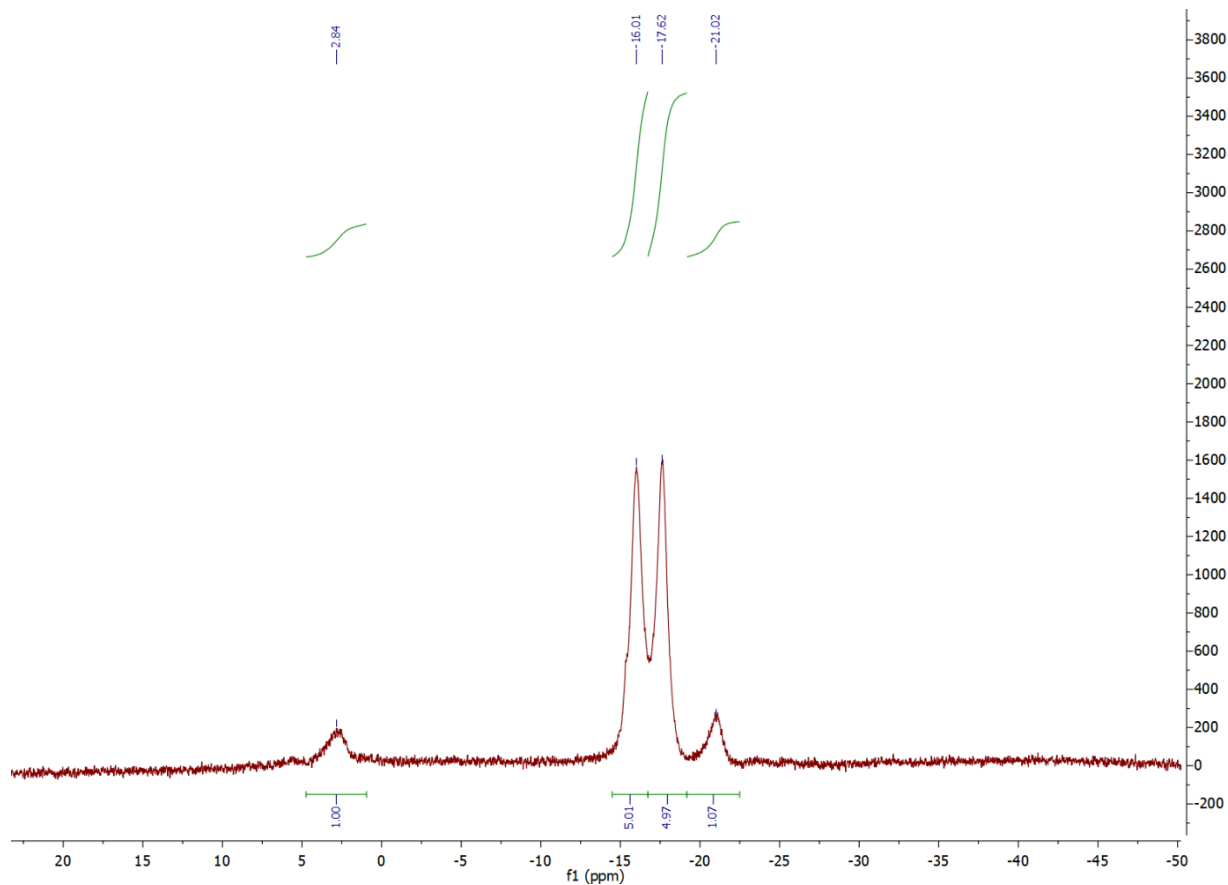

**Figure S1.**  $^{11}\text{B}\{^1\text{H}\}$  NMR spectrum of  $((n\text{-C}_4\text{H}_9)_4\text{N})_2[\text{B}_{12}\text{H}_{11}\text{OC}(\text{O})\text{CH}_3]$

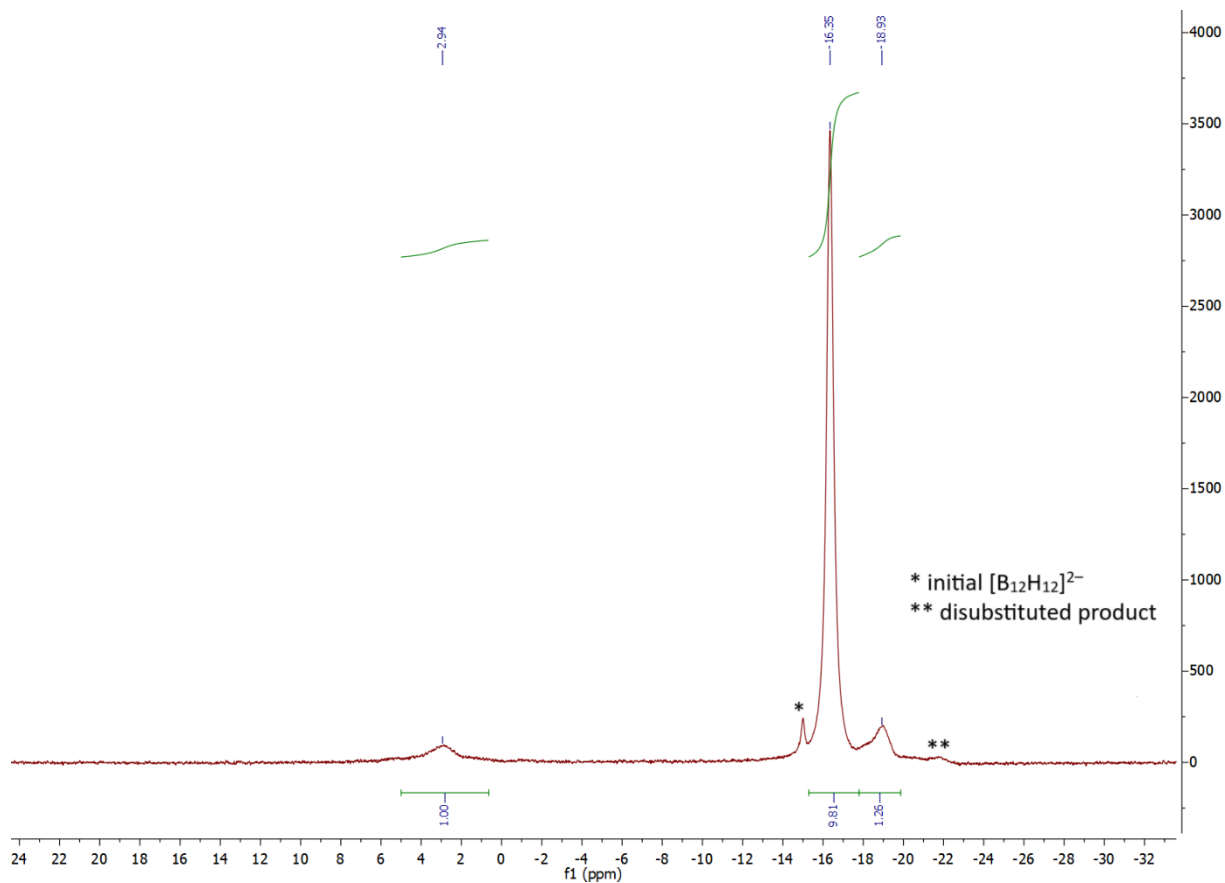

**Figure S2.**  $^{11}\text{B}\{^1\text{H}\}$  NMR spectrum of  $((n\text{-C}_4\text{H}_9)_4\text{N})[\text{B}_{12}\text{H}_{11}\text{OC}(\text{OH})\text{CH}_3]$

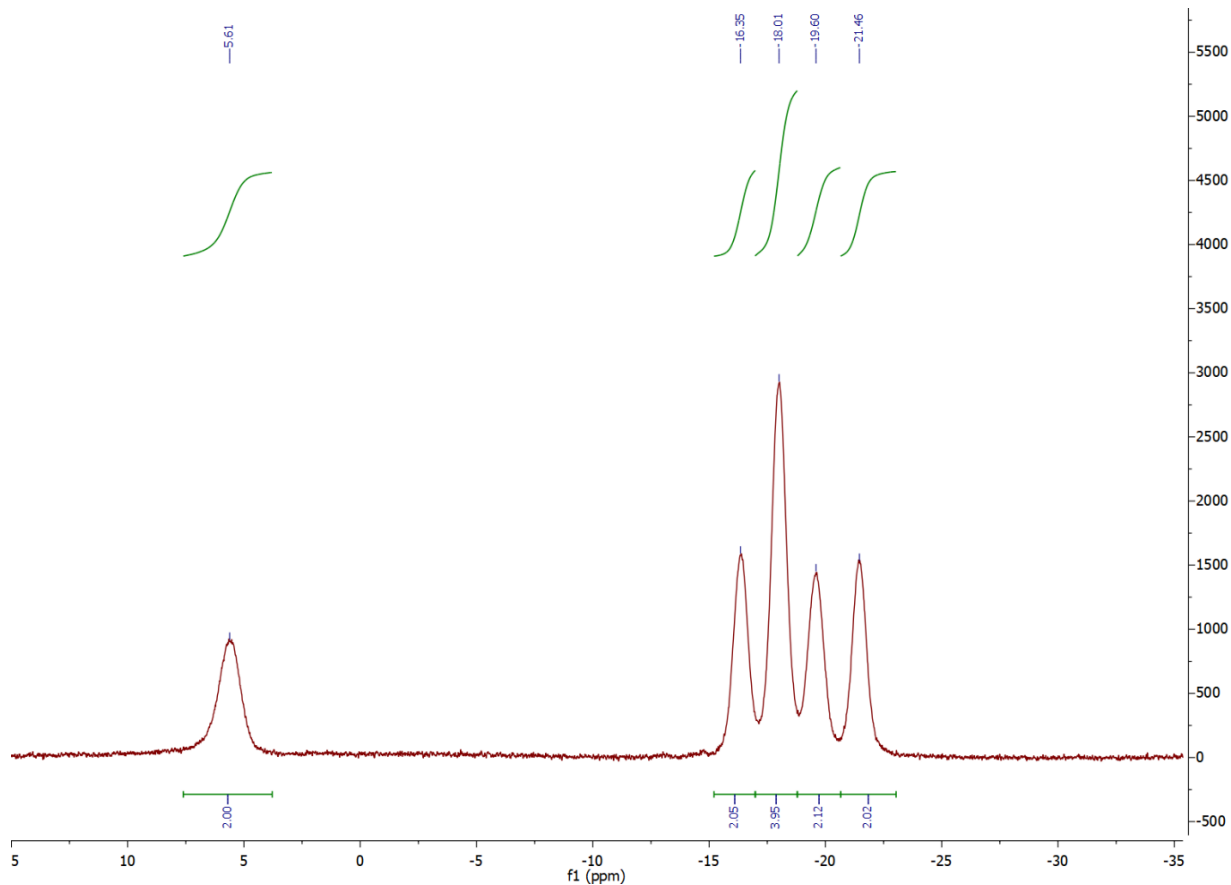

**Figure S3.**  $^{11}\text{B}\{^1\text{H}\}$  NMR spectrum of  $((n\text{-C}_4\text{H}_9)_4\text{N})[1,2\text{-B}_{12}\text{H}_{10}\text{O}_2\text{CCH}_3]$

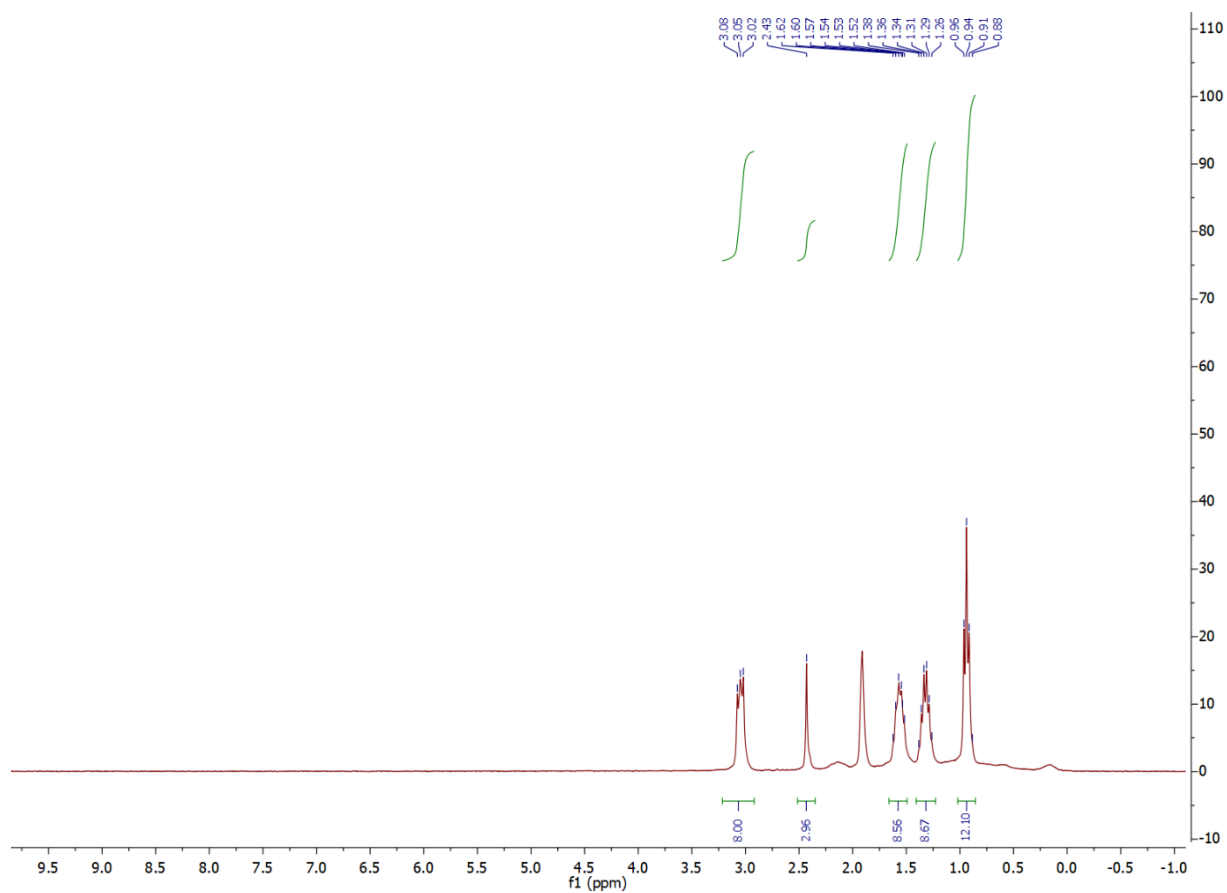

**Figure S4.**  $^1\text{H}$  NMR spectrum of  $((n\text{-C}_4\text{H}_9)_4\text{N})[1,2\text{-B}_{12}\text{H}_{10}\text{O}_2\text{CCH}_3]$

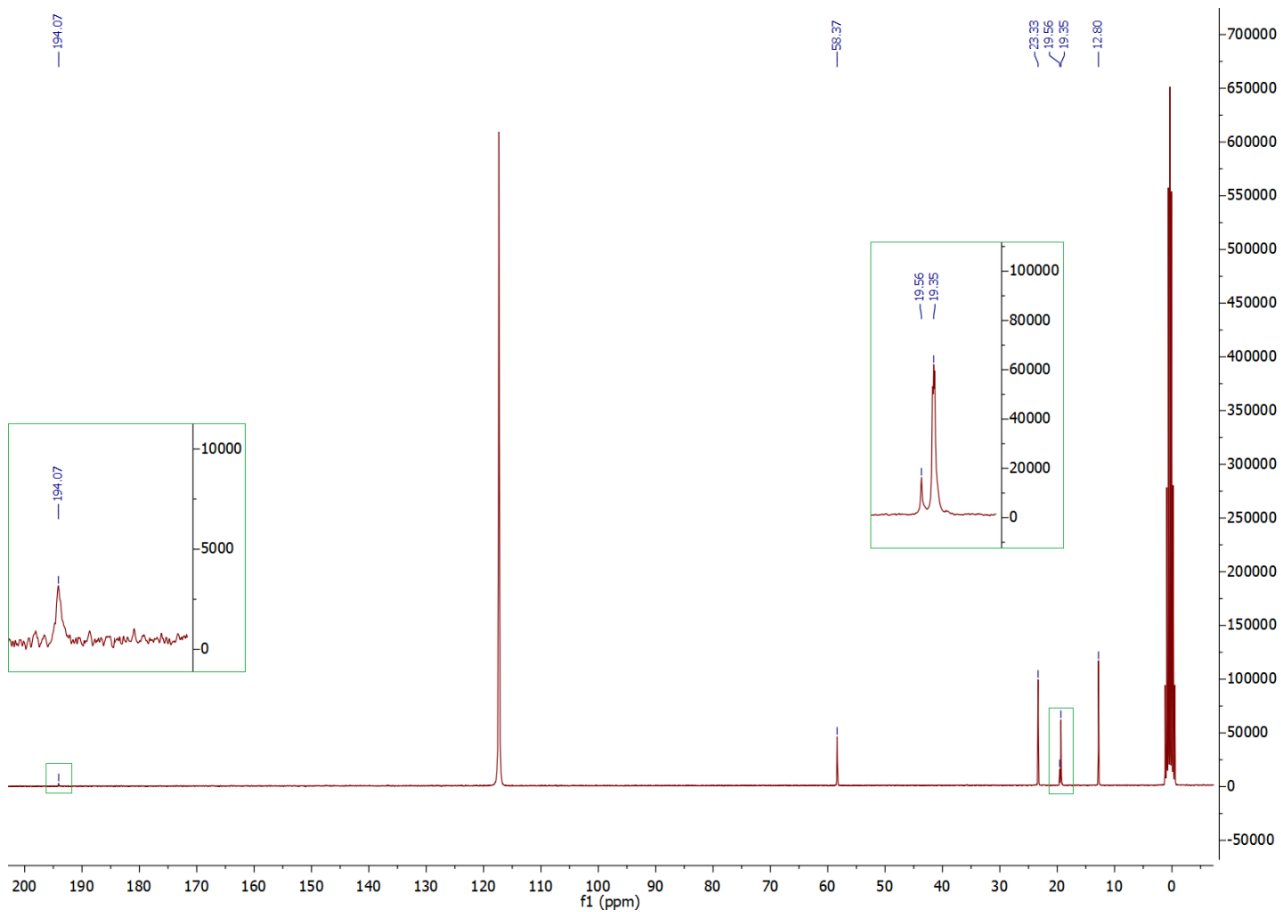

**Figure S5.**  $^{13}\text{C}\{^1\text{H}\}$  NMR spectrum of  $((n\text{-C}_4\text{H}_9)_4\text{N})[1,2\text{-B}_{12}\text{H}_{10}\text{O}_2\text{CCH}_3]$

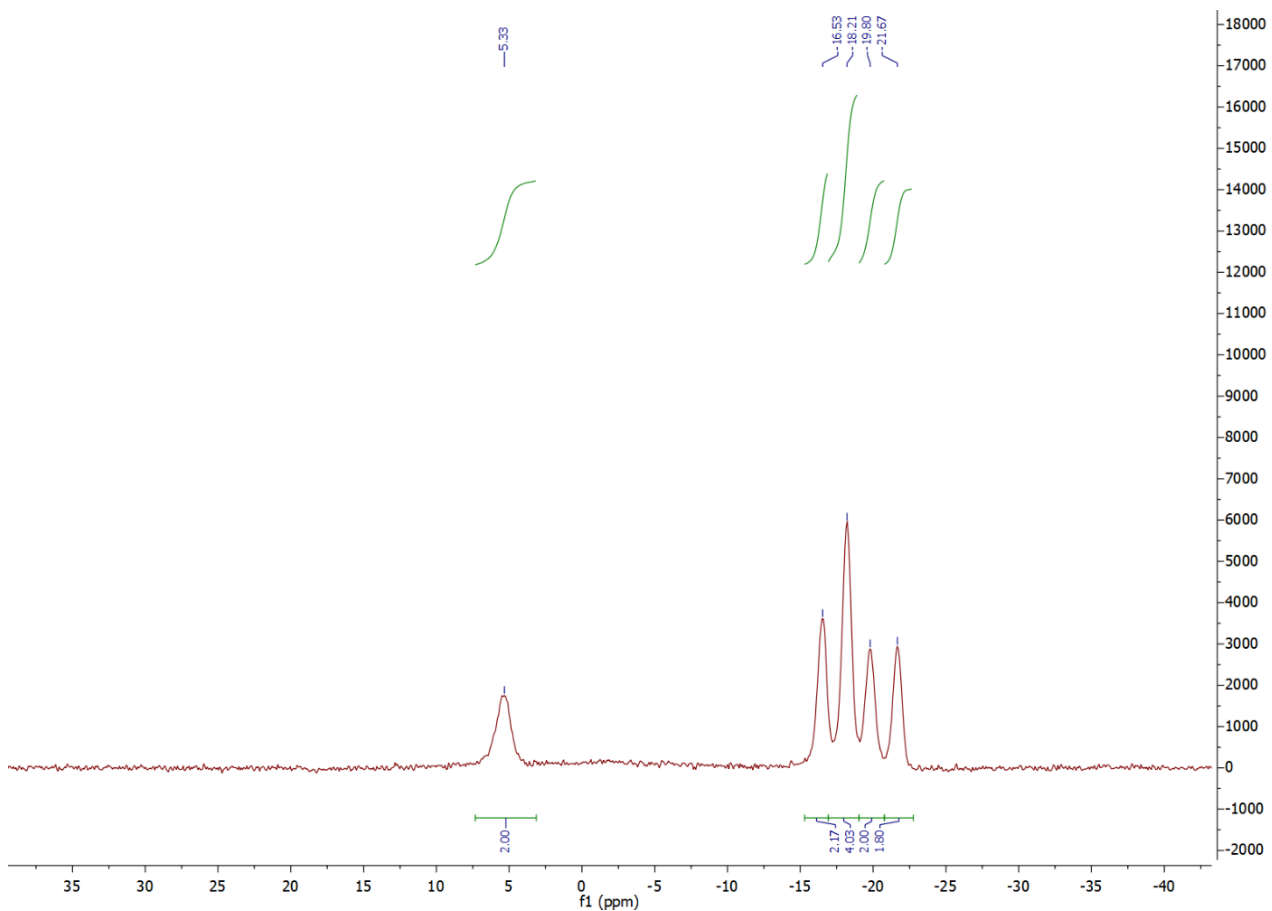

**Figure S6.**  $^{11}\text{B}\{^1\text{H}\}$  NMR spectrum of  $((n\text{-C}_4\text{H}_9)_4\text{N})[1,2\text{-B}_{12}\text{H}_{10}\text{O}_2\text{CC}_2\text{H}_5]$

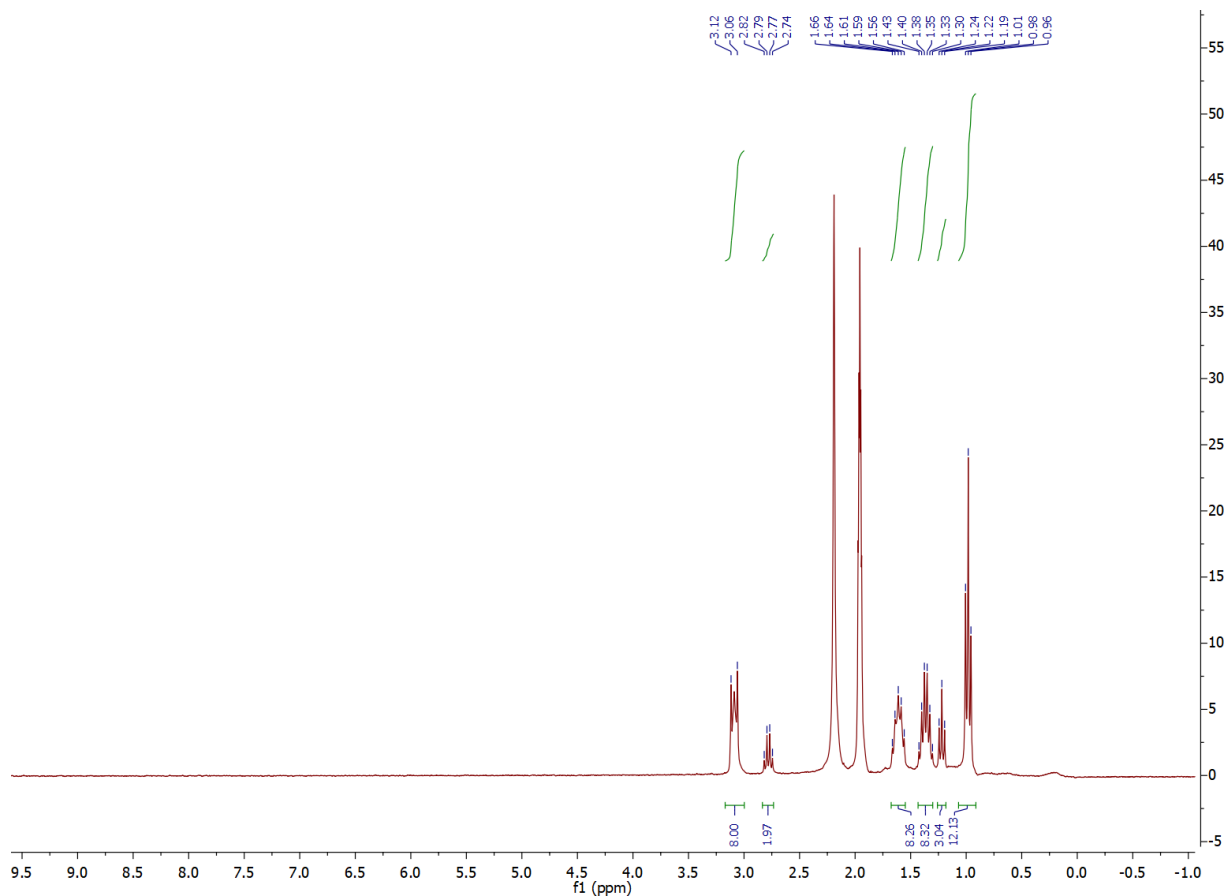

**Figure S7.**  $^1\text{H}$  NMR spectrum of  $((n\text{-C}_4\text{H}_9)_4\text{N})[1,2\text{-B}_{12}\text{H}_{10}\text{O}_2\text{CC}_2\text{H}_5]$

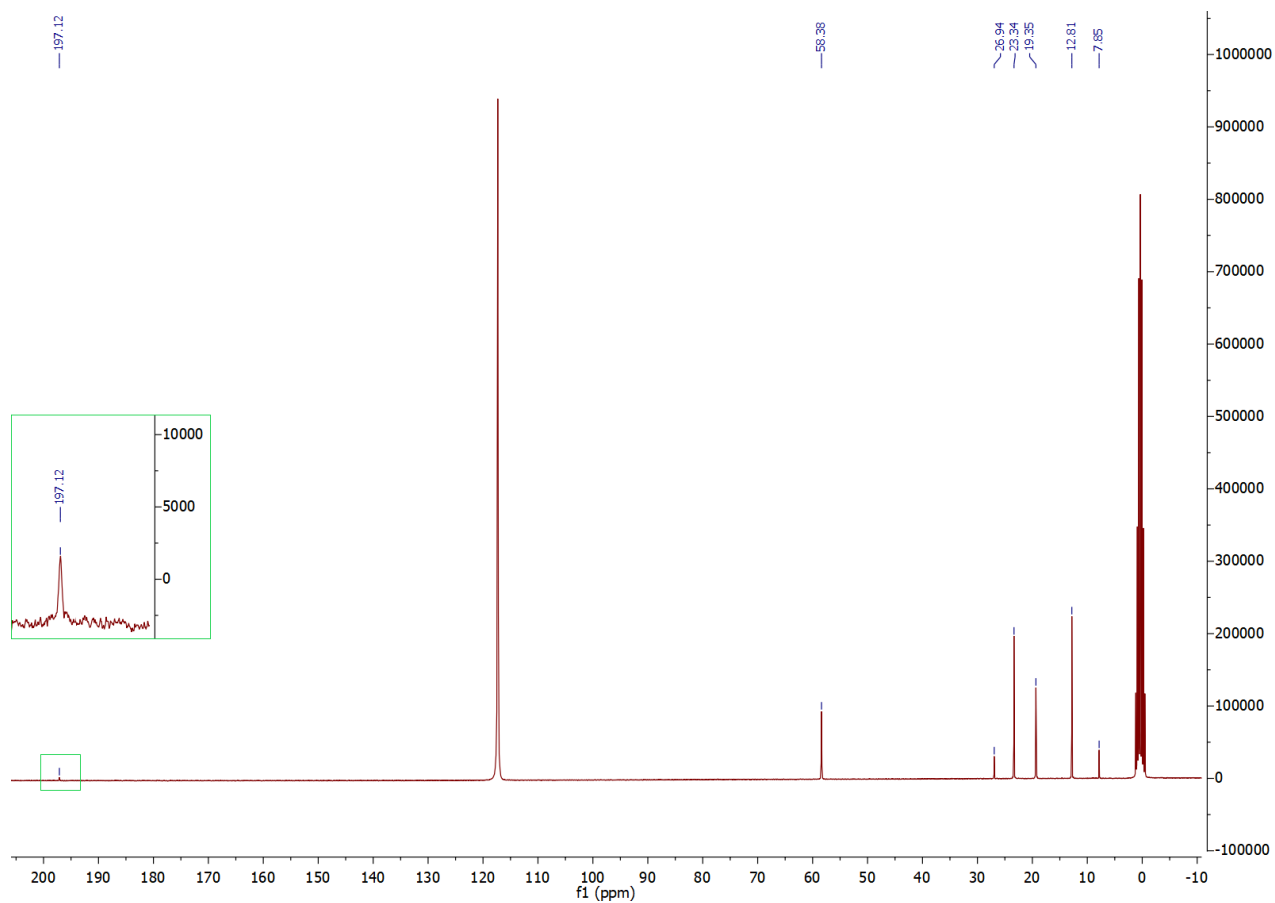

**Figure S8.**  $^{13}\text{C}\{^1\text{H}\}$  NMR spectrum of  $((n\text{-C}_4\text{H}_9)_4\text{N})[1,2\text{-B}_{12}\text{H}_{10}\text{O}_2\text{CC}_2\text{H}_5]$

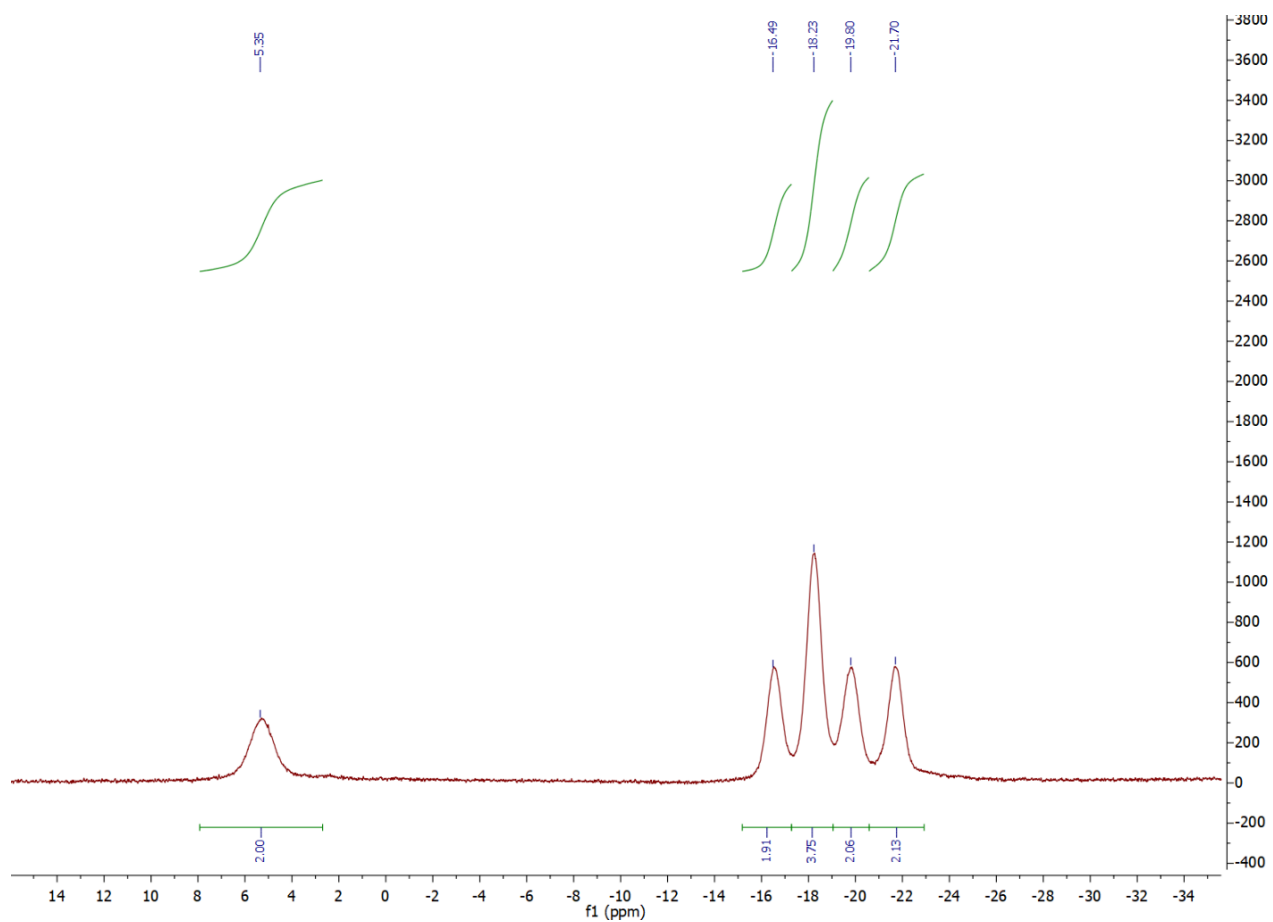

**Figure S9.**  $^{11}\text{B}\{^1\text{H}\}$  NMR spectrum of  $((n\text{-C}_4\text{H}_9)_4\text{N})[1,2\text{-B}_{12}\text{H}_{10}\text{O}_2\text{CC}_3\text{H}_7]$

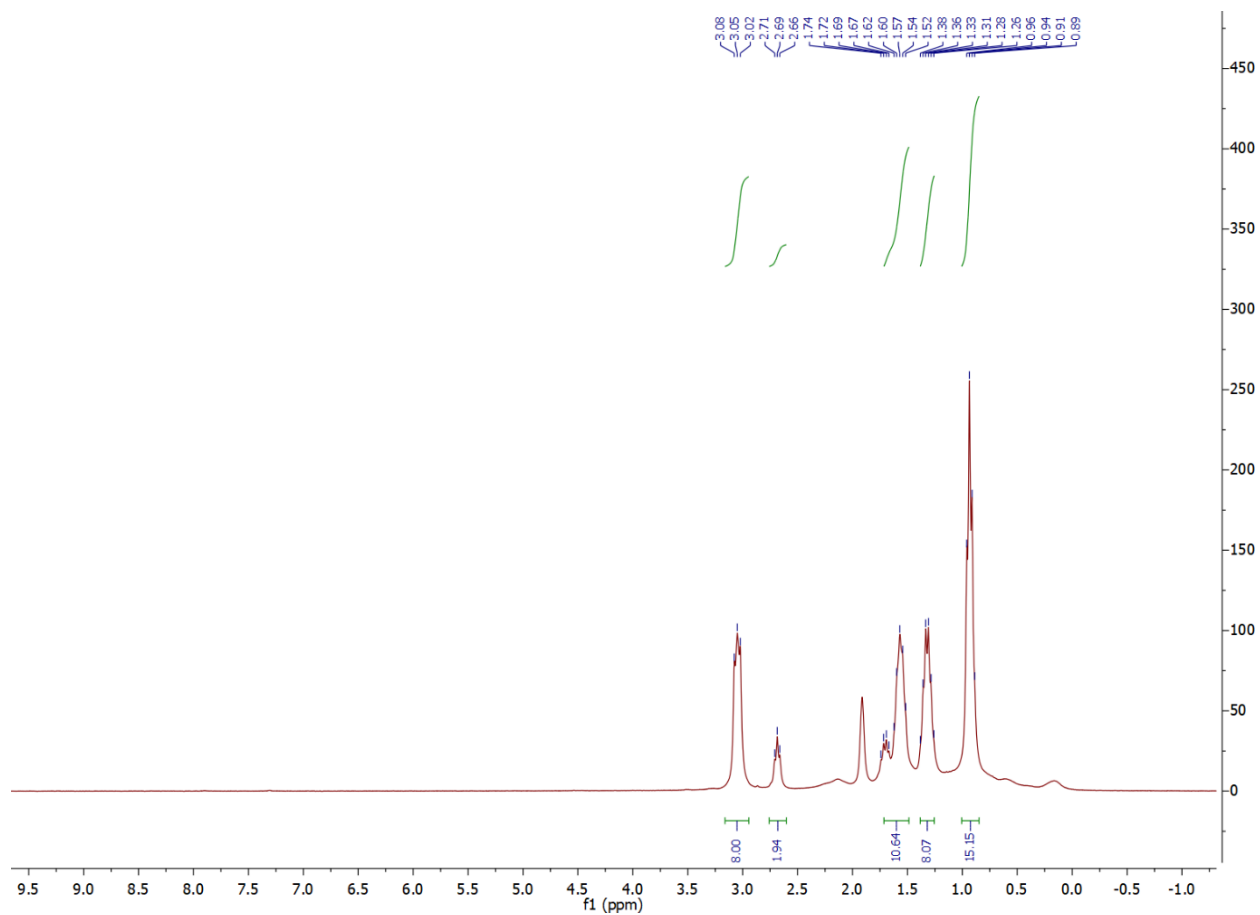

**Figure S10.**  $^1\text{H}$  NMR spectrum of  $((n\text{-C}_4\text{H}_9)_4\text{N})[1,2\text{-B}_{12}\text{H}_{10}\text{O}_2\text{CC}_3\text{H}_7]$

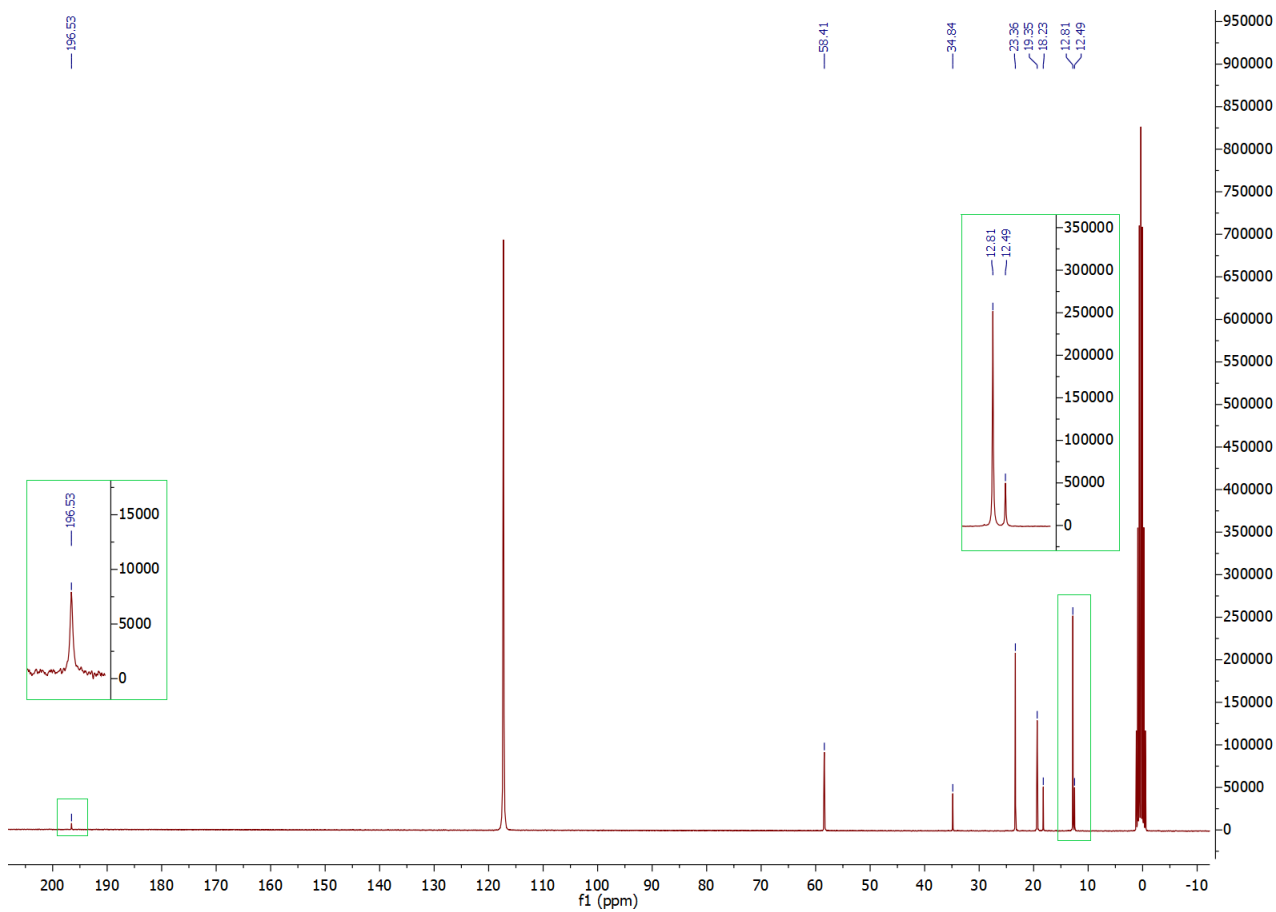

**Figure S11.**  $^{13}\text{C}\{^1\text{H}\}$  NMR spectrum of  $((n\text{-C}_4\text{H}_9)_4\text{N})[1,2\text{-B}_{12}\text{H}_{10}\text{O}_2\text{CC}_3\text{H}_7]$

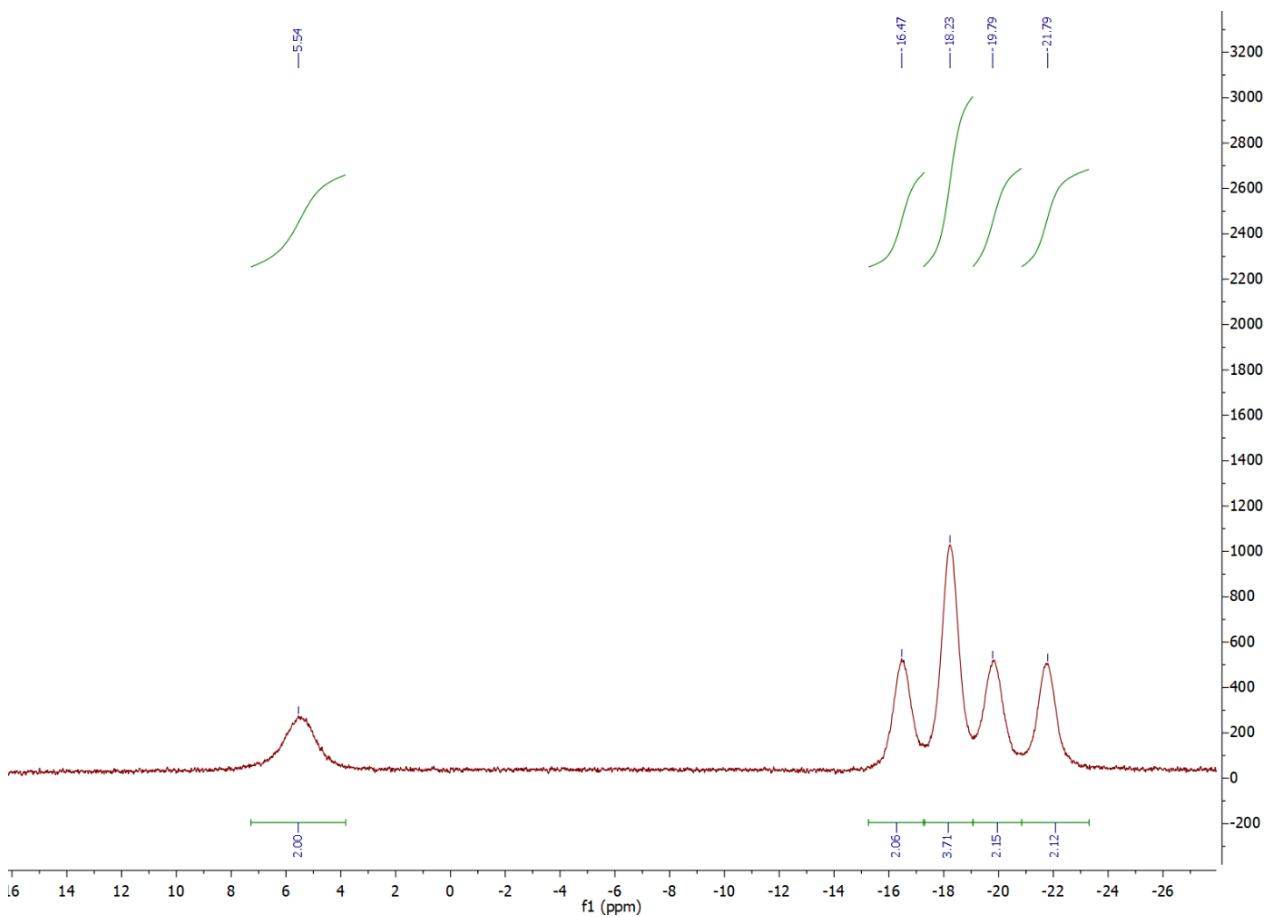

**Figure S12.**  $^{11}\text{B}\{^1\text{H}\}$  NMR spectrum of  $((n\text{-C}_4\text{H}_9)_4\text{N})[1,2\text{-B}_{12}\text{H}_{10}\text{O}_2\text{CC}_6\text{H}_5]$

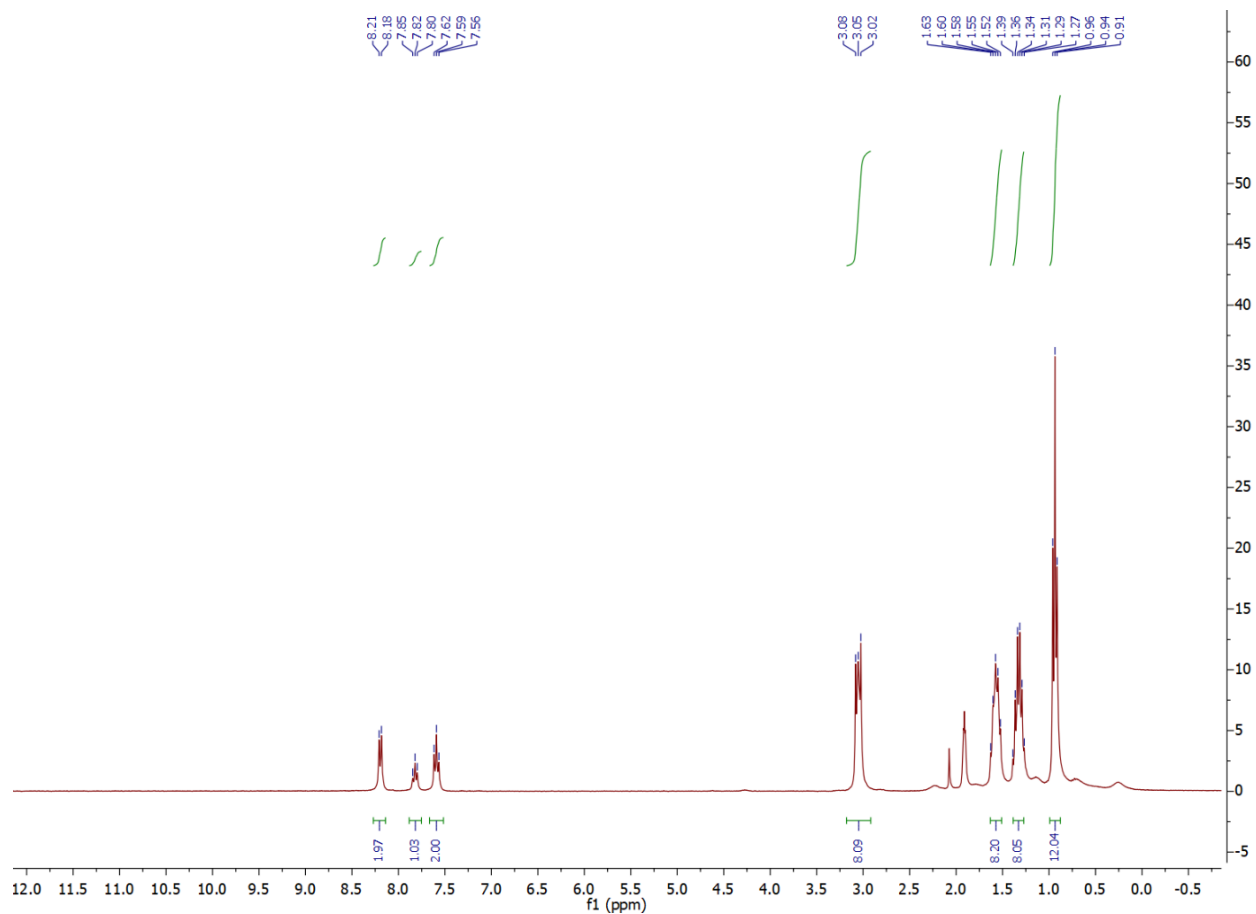

**Figure S13.**  $^1\text{H}$  NMR spectrum of  $((n\text{-C}_4\text{H}_9)_4\text{N})[1,2\text{-B}_{12}\text{H}_{10}\text{O}_2\text{CC}_6\text{H}_5]$

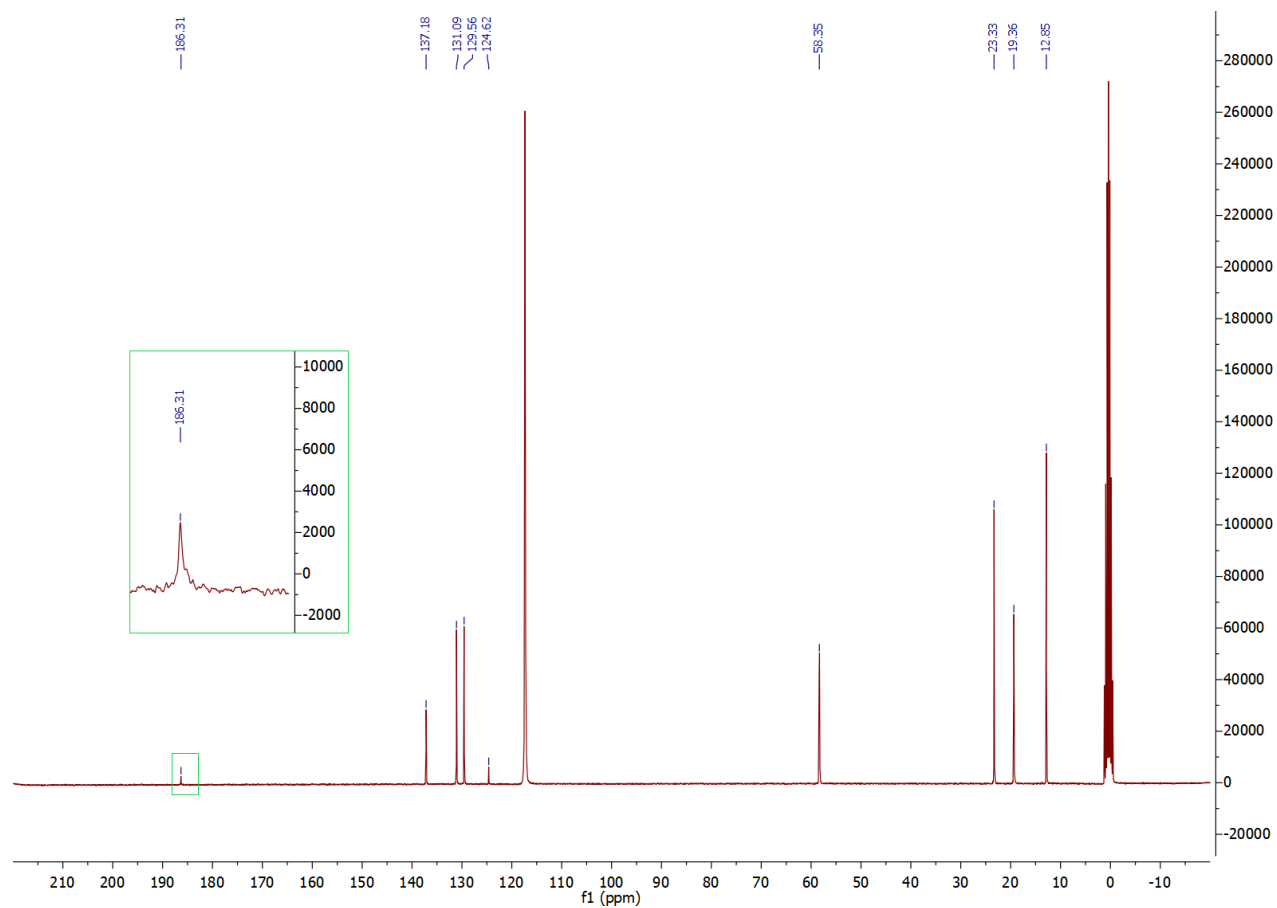

**Figure S14.**  $^{13}\text{C}\{^1\text{H}\}$  NMR spectrum of  $((n\text{-C}_4\text{H}_9)_4\text{N})[1,2\text{-B}_{12}\text{H}_{10}\text{O}_2\text{CC}_6\text{H}_5]$



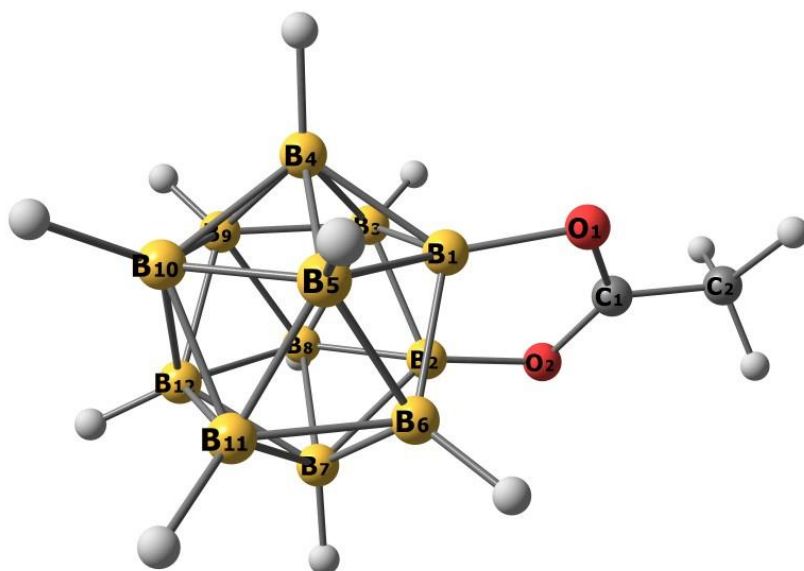

**Figure S15.** Atom numbering in  $[1,2\text{-B}_{12}\text{H}_{10}\text{O}_2\text{CCH}_3]^-$  (for  $^{11}\text{B}\text{-}^{11}\text{B}$  COSY spectrum below)

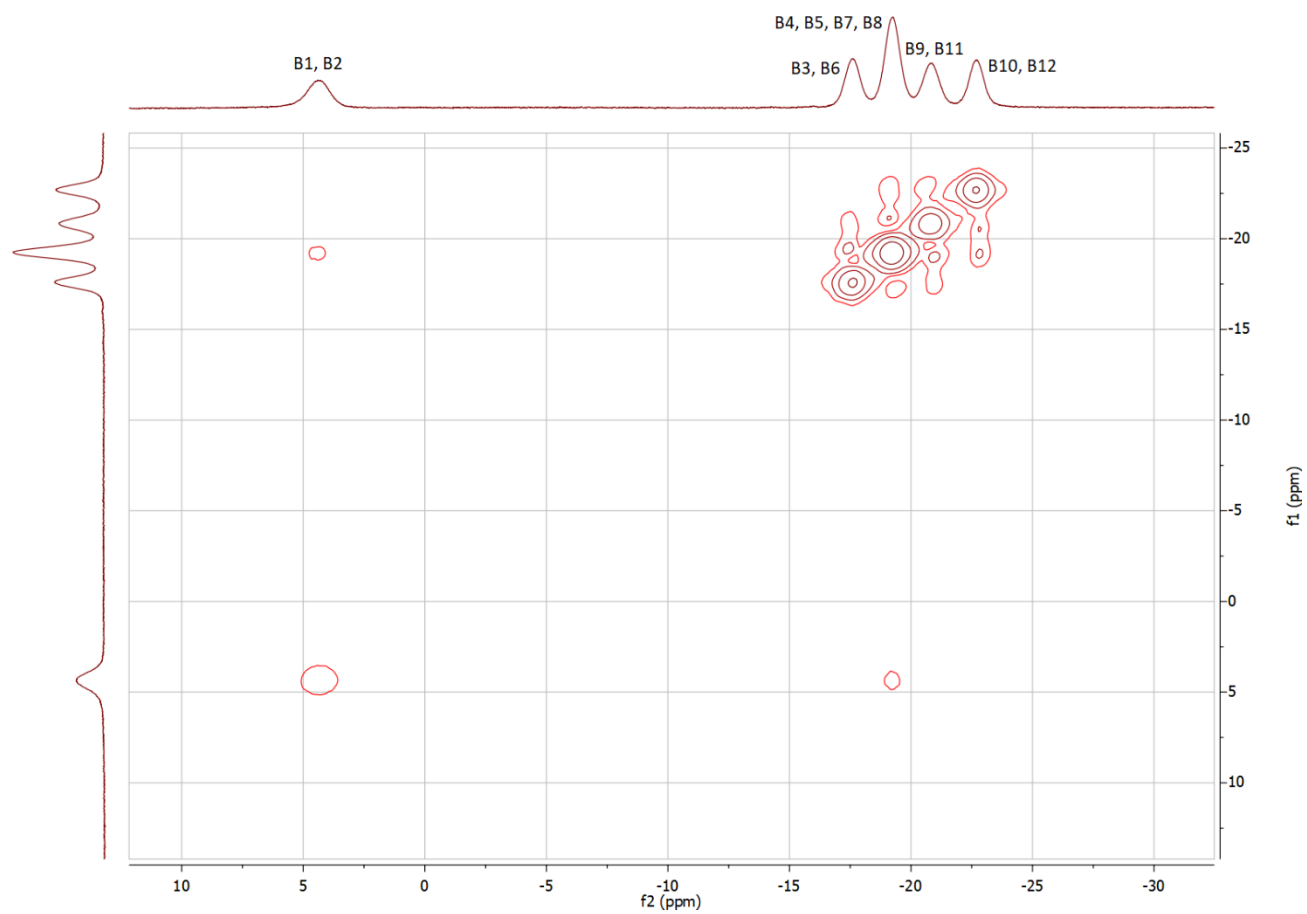

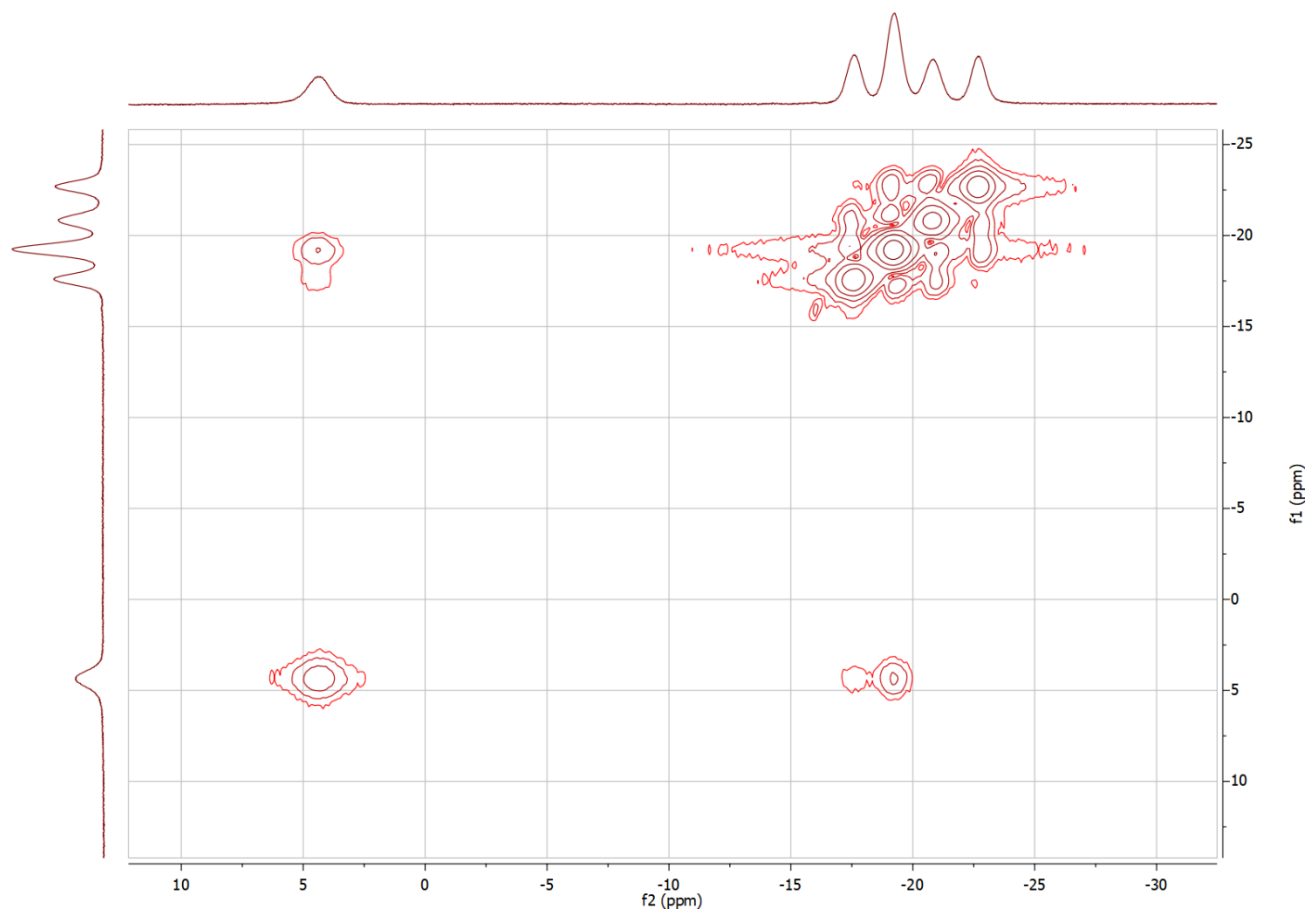

**Figure S16.**  $^{11}\text{B}$ - $^{11}\text{B}$  COSY spectrum of  $[1,2\text{-B}_{12}\text{H}_{10}\text{O}_2\text{CCH}_3]^-$

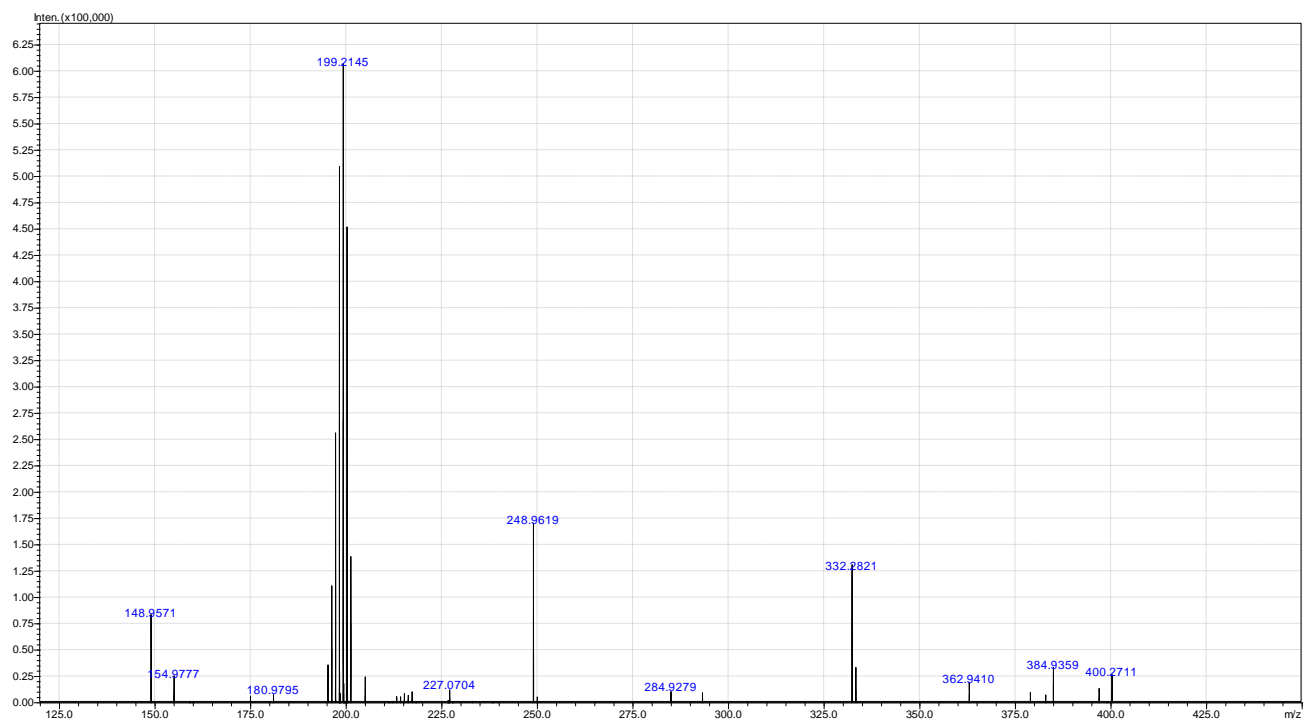

**Figure S17.** ESI-MS spectrum of  $((n\text{-C}_4\text{H}_9)_4\text{N})[1,2\text{-B}_{12}\text{H}_{10}\text{O}_2\text{CCH}_3]$  (negative area)

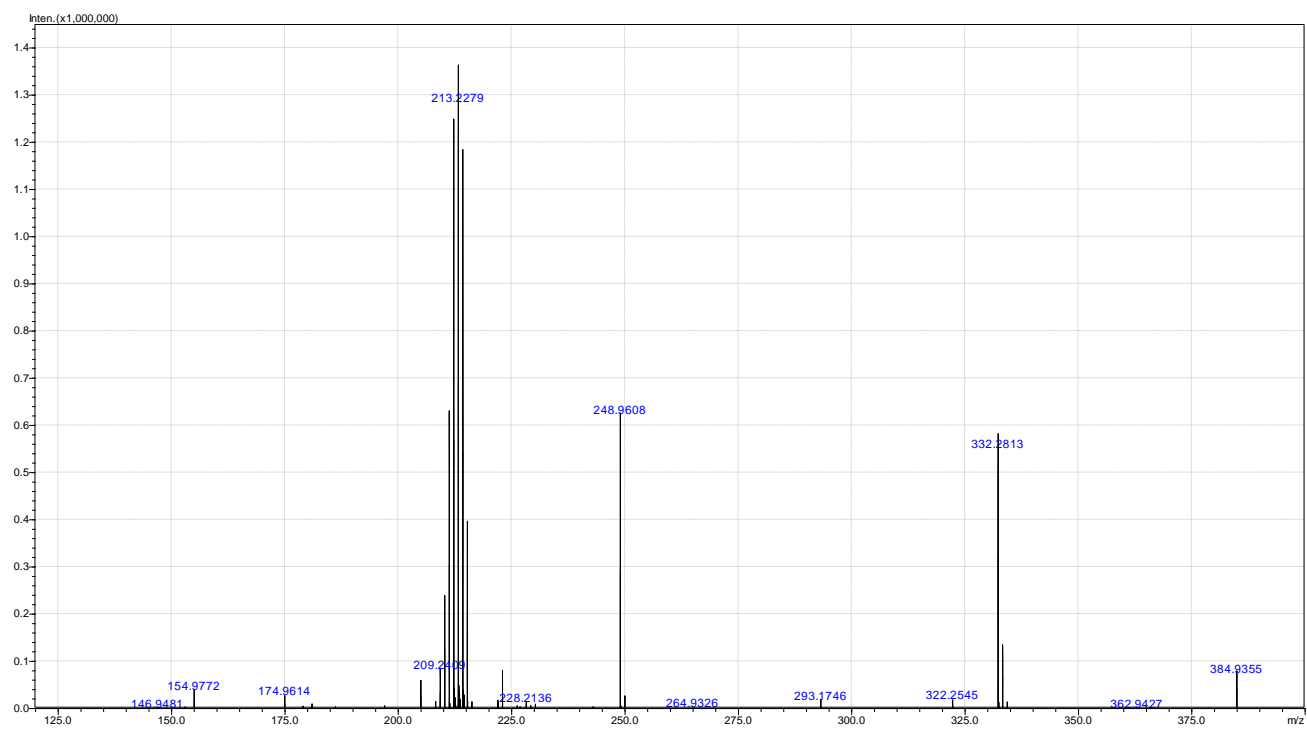

**Figure S18.** ESI-MS spectrum of  $((n\text{-C}_4\text{H}_9)_4\text{N})[1,2\text{-B}_{12}\text{H}_{10}\text{O}_2\text{CC}_2\text{H}_5]$  (negative area)

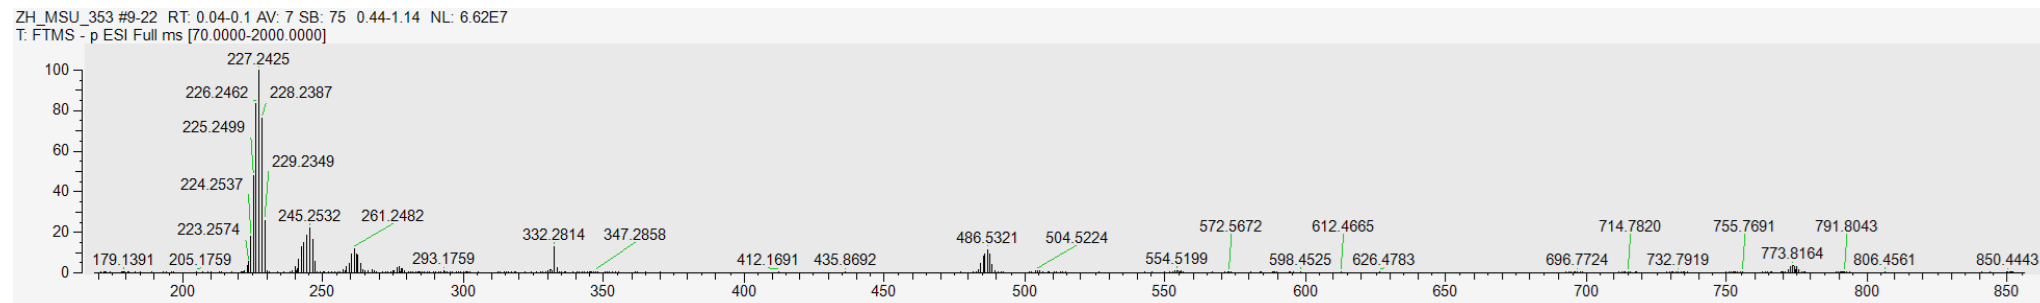

**Figure S19.** ESI-MS spectrum of  $((n\text{-C}_4\text{H}_9)_4\text{N})[1,2\text{-B}_{12}\text{H}_{10}\text{O}_2\text{CC}_3\text{H}_7]$  (negative area)

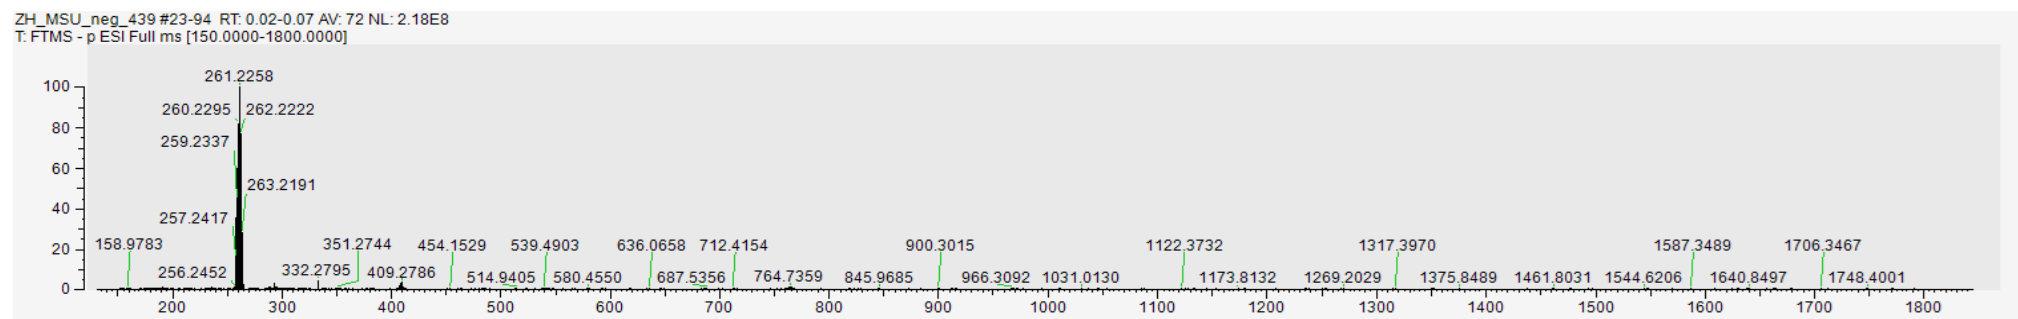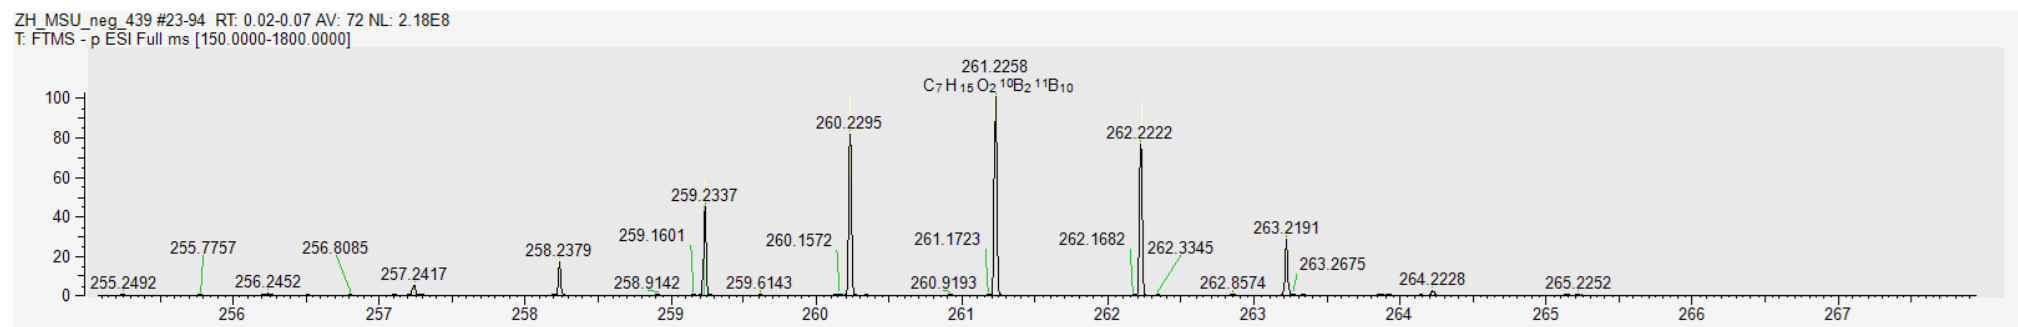

**Figure S20.** ESI-MS spectrum of  $((n\text{-C}_4\text{H}_9)_4\text{N})[1,2\text{-B}_{12}\text{H}_{10}\text{O}_2\text{CC}_6\text{H}_5]$  (negative area)

|                                        |                                                                                                                                       |                                                                                                                                       |
|----------------------------------------|---------------------------------------------------------------------------------------------------------------------------------------|---------------------------------------------------------------------------------------------------------------------------------------|
| Compound                               | <b><i>((n-C<sub>4</sub>H<sub>9</sub>)<sub>4</sub>N)[1,2-B<sub>12</sub>H<sub>10</sub>O<sub>2</sub>CCH<sub>3</sub>]</i></b>             | <b><i>((n-C<sub>4</sub>H<sub>9</sub>)<sub>4</sub>N)[1,2-B<sub>12</sub>H<sub>10</sub>O<sub>2</sub>CC<sub>2</sub>H<sub>5</sub>]</i></b> |
| Chemical formula                       | C <sub>18</sub> H <sub>49</sub> B <sub>12</sub> NO <sub>2</sub>                                                                       | C <sub>19</sub> H <sub>51</sub> B <sub>12</sub> NO <sub>2</sub>                                                                       |
| M <sub>r</sub>                         | 441.30                                                                                                                                | 455.32                                                                                                                                |
| Temperature, K                         | 100.00                                                                                                                                | 100.00                                                                                                                                |
| Crystal system                         | orthorhombic                                                                                                                          | monoclinic                                                                                                                            |
| Space group                            | Pbca                                                                                                                                  | P2 <sub>1</sub> , n                                                                                                                   |
| <i>a</i> , Å                           | 17.10(3)                                                                                                                              | 9.167(6)                                                                                                                              |
| <i>b</i> , Å                           | 15.16(4)                                                                                                                              | 21.48(3)                                                                                                                              |
| <i>c</i> , Å                           | 22.21(4)                                                                                                                              | 14.716(16)                                                                                                                            |
| <i>β</i> , °                           | 90                                                                                                                                    | 95.05(4)                                                                                                                              |
| <i>V</i> , Å <sup>3</sup>              | 5757(20)                                                                                                                              | 2886(5)                                                                                                                               |
| <i>Z</i>                               | 8                                                                                                                                     | 4                                                                                                                                     |
| ρ <sub>calc</sub> , g, cm <sup>3</sup> | 1.018                                                                                                                                 | 1.048                                                                                                                                 |
| μ, mm <sup>-1</sup>                    | 0.056                                                                                                                                 | 0.419                                                                                                                                 |
| F(000)                                 | 1920.0                                                                                                                                | 992.0                                                                                                                                 |
| Radiation type                         | MoKα (λ = 0.71073)                                                                                                                    | CuKα (λ = 1.54184)                                                                                                                    |
| 2θ range for data collection,          | 4.032 to 49.996                                                                                                                       | 7.3 to 133.35                                                                                                                         |
| Reflections collected                  | 19274                                                                                                                                 | 25006                                                                                                                                 |
| Independent reflections                | 5050<br>[R <sub>int</sub> = 0.0681, R <sub>sigma</sub> = 0.0791]                                                                      | 5008<br>[R <sub>int</sub> = 0.0323, R <sub>sigma</sub> = 0.0306]                                                                      |
| <i>S</i>                               | 1.015                                                                                                                                 | 1.904                                                                                                                                 |
| Final R indexes [I >= 2σ (I)]          | R <sub>1</sub> = 0.0621, wR <sub>2</sub> = 0.1461                                                                                     | R <sub>1</sub> = 0.1063, wR <sub>2</sub> = 0.3803                                                                                     |
| Final R indexes [all data]             | R <sub>1</sub> = 0.1093, wR <sub>2</sub> = 0.1755                                                                                     | R <sub>1</sub> = 0.1103, wR <sub>2</sub> = 0.3888                                                                                     |
| Compound                               | <b><i>((n-C<sub>4</sub>H<sub>9</sub>)<sub>4</sub>N)[1,2-B<sub>12</sub>H<sub>10</sub>O<sub>2</sub>CC<sub>3</sub>H<sub>7</sub>]</i></b> | <b><i>((n-C<sub>4</sub>H<sub>9</sub>)<sub>4</sub>N)[1,2-B<sub>12</sub>H<sub>10</sub>O<sub>2</sub>CC<sub>6</sub>H<sub>5</sub>]</i></b> |
| Chemical formula                       | C <sub>20</sub> H <sub>52</sub> B <sub>12</sub> NO <sub>2</sub>                                                                       | C <sub>23</sub> H <sub>51</sub> B <sub>12</sub> NO <sub>2</sub>                                                                       |
| M <sub>r</sub>                         | 468.34                                                                                                                                | 503.36                                                                                                                                |
| Temperature, K                         | 100.00                                                                                                                                | 100.00                                                                                                                                |
| Crystal system                         | monoclinic                                                                                                                            | monoclinic                                                                                                                            |
| Space group                            | P2 <sub>1</sub> , n                                                                                                                   | P2 <sub>1</sub> , c                                                                                                                   |
| <i>a</i> , Å                           | 9.3412(9)                                                                                                                             | 17.052(6)                                                                                                                             |
| <i>b</i> , Å                           | 21.8620(17)                                                                                                                           | 11.397(2)                                                                                                                             |
| <i>c</i> , Å                           | 14.5823(15)                                                                                                                           | 16.762(4)                                                                                                                             |
| <i>β</i> , °                           | 95.341(4)                                                                                                                             | 107.565(14)                                                                                                                           |
| <i>V</i> , Å <sup>3</sup>              | 2965.0(5)                                                                                                                             | 3105.9(15)                                                                                                                            |
| <i>Z</i>                               | 4                                                                                                                                     | 4                                                                                                                                     |
| ρ <sub>calc</sub> , g, cm <sup>3</sup> | 1.049                                                                                                                                 | 1.076                                                                                                                                 |
| μ, mm <sup>-1</sup>                    | 0.058                                                                                                                                 | 0.059                                                                                                                                 |
| F(000)                                 | 1020.0                                                                                                                                | 1088.0                                                                                                                                |
| Radiation type                         | MoKα (λ = 0.71073)                                                                                                                    | MoKα (λ = 0.71073)                                                                                                                    |
| 2θ range for data collection,          | 3.368 to 49.988                                                                                                                       | 4.364 to 55.998                                                                                                                       |
| Reflections collected                  | 23942                                                                                                                                 | 28719                                                                                                                                 |
| Independent reflections                | 5196<br>[R <sub>int</sub> = 0.0571, R <sub>sigma</sub> = 0.0461]                                                                      | 7490<br>[R <sub>int</sub> = 0.0356, R <sub>sigma</sub> = 0.0358]                                                                      |
| <i>S</i>                               | 1.025                                                                                                                                 | 1.116                                                                                                                                 |
| Final R indexes [I >= 2σ (I)]          | R <sub>1</sub> = 0.1037, wR <sub>2</sub> = 0.2612                                                                                     | R <sub>1</sub> = 0.0523, wR <sub>2</sub> = 0.1218                                                                                     |
| Final R indexes [all data]             | R <sub>1</sub> = 0.1382, wR <sub>2</sub> = 0.2904                                                                                     | R <sub>1</sub> = 0.0637, wR <sub>2</sub> = 0.1270                                                                                     |

**Table S1.** Crystal data and structure refinement for all compounds studied

Despite the good quality of the experiment for the structures of  $((n\text{-C}_4\text{H}_9)_4\text{N})[1,2\text{-B}_{12}\text{H}_{10}\text{O}_2\text{CC}_2\text{H}_5]$  and  $((n\text{-C}_4\text{H}_9)_4\text{N})[1,2\text{-B}_{12}\text{H}_{10}\text{O}_2\text{CC}_3\text{H}_7]$ , their R1 was 10.6% and 10.4%, respectively, and for the structure of  $((n\text{-C}_4\text{H}_9)_4\text{N})[1,2\text{-B}_{12}\text{H}_{10}\text{O}_2\text{CC}_2\text{H}_5]$  GOOF was 1.904. The high value of these parameters was due to the high degree of disorder of *closo*-borate anions (See SI for more details) and tetrabutylammonium cations. Despite the high values of R1 and GOOF parameters, the structural models of these compounds were undoubtedly correct.

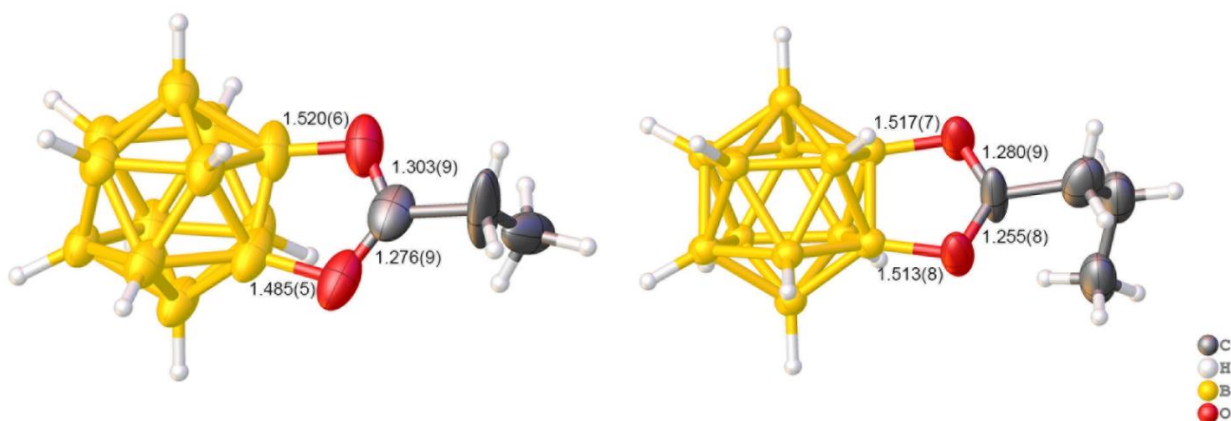

**Figure S21.** X-ray structures of  $[1,2\text{-B}_{12}\text{H}_{10}\text{O}_2\text{CC}_2\text{H}_5]^-$  (left) and  $[1,2\text{-B}_{12}\text{H}_{10}\text{O}_2\text{CC}_3\text{H}_7]^-$  (right). Length units – Å

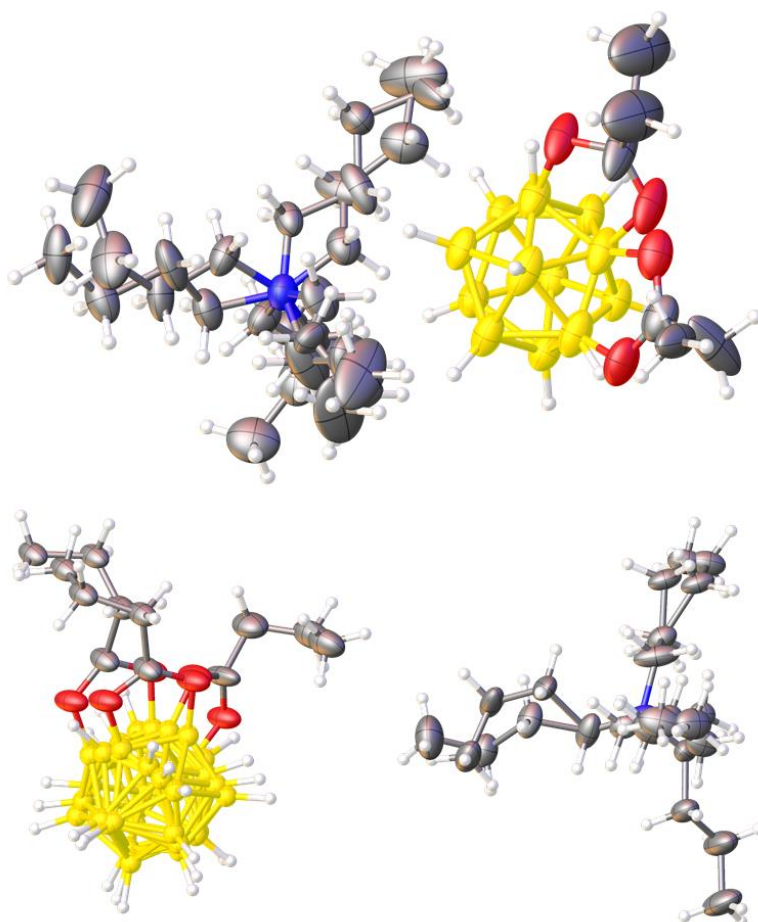

**Figure S22.** Disorder in the structures of  $((n\text{-C}_4\text{H}_9)_4\text{N})[1,2\text{-B}_{12}\text{H}_{10}\text{O}_2\text{CC}_2\text{H}_5]$  (top) and  $((n\text{-C}_4\text{H}_9)_4\text{N})[1,2\text{-B}_{12}\text{H}_{10}\text{O}_2\text{CC}_3\text{H}_7]$  (bottom). The thermal ellipsoids are shown at 50% probability level

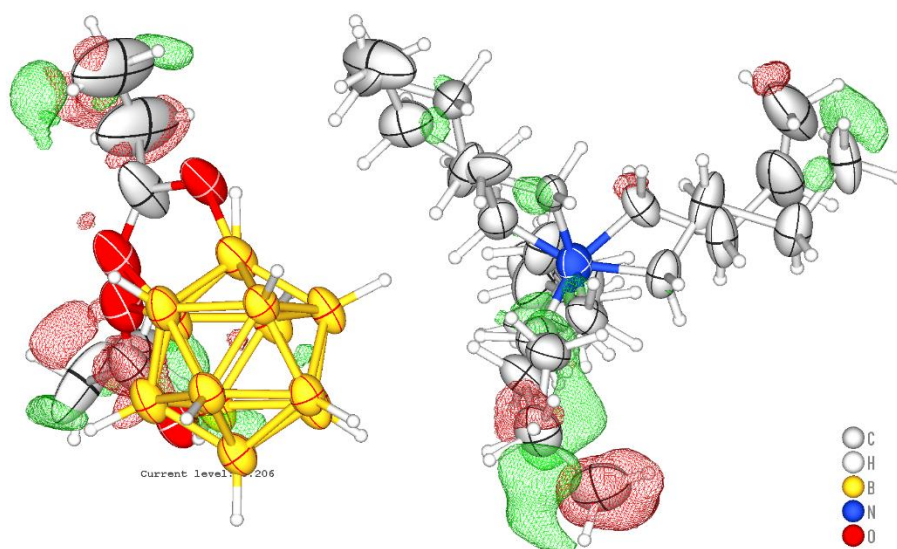

**Figure S23.** Residual density plot in the structure of  $((n\text{-C}_4\text{H}_9)_4\text{N})[1,2\text{-B}_{12}\text{H}_{10}\text{O}_2\text{CC}_2\text{H}_5]$

## 2. Computational data

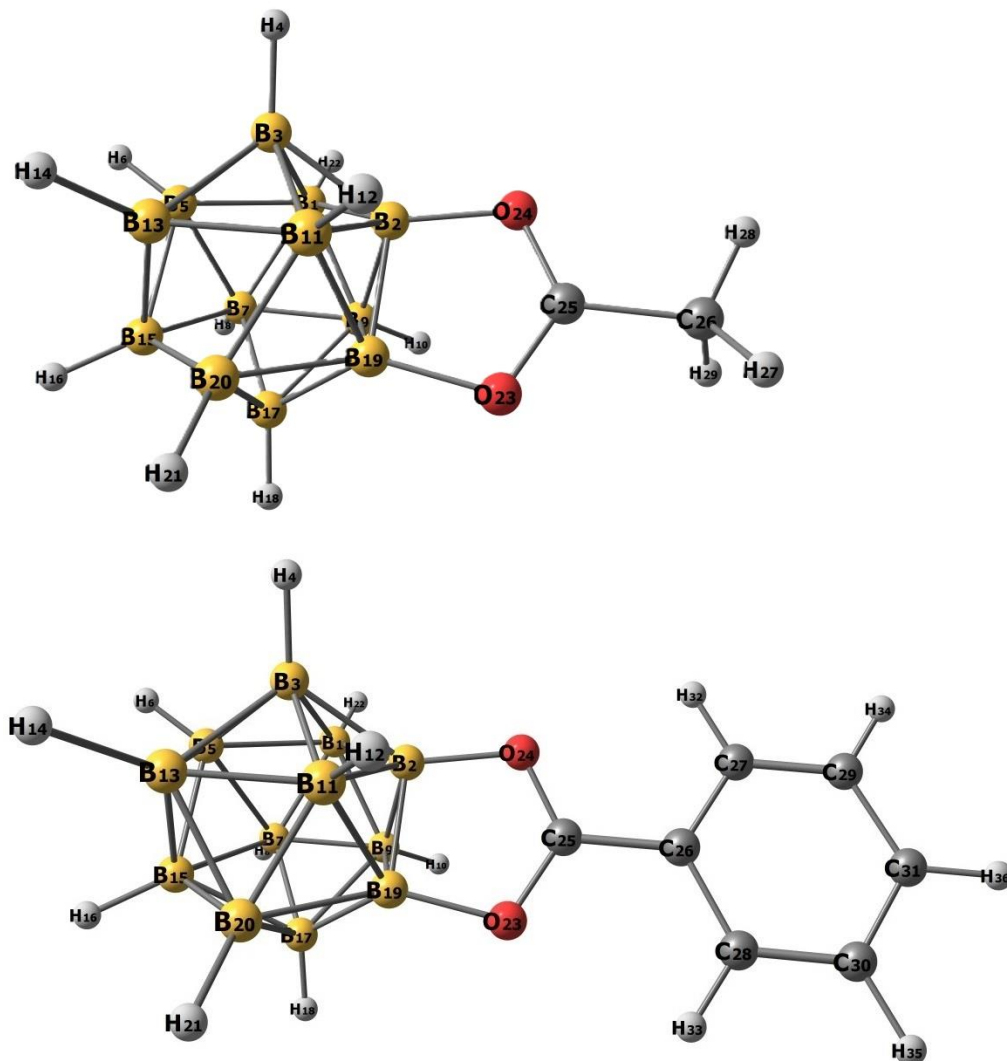

**Figure S24.** Automatically generated (using ChemCraft software) atom numbering in  $[1,2\text{-B}_{12}\text{H}_{10}\text{O}_2\text{CR}]^-$  (for Tables S2, S3, S6 and S7 below)

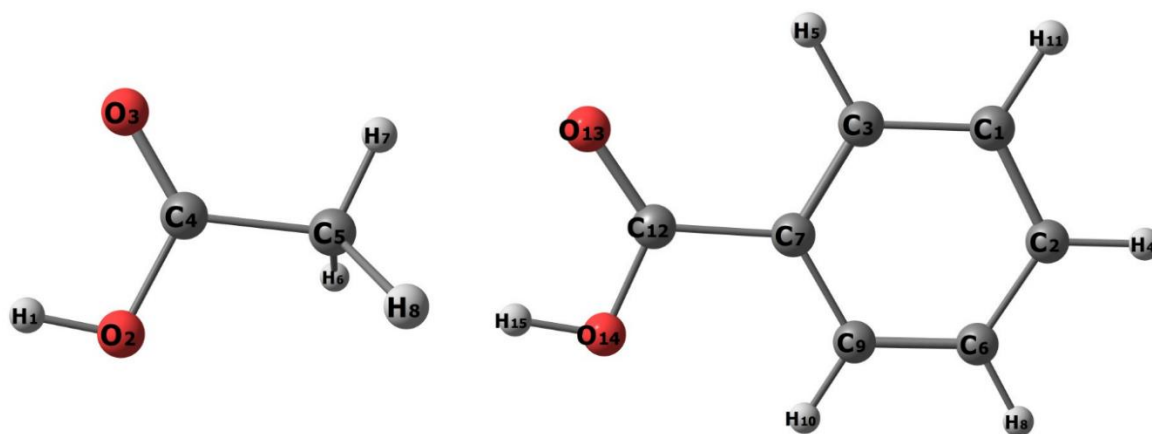

**Figure S25.** Automatically generated (using ChemCraft software) atom numbering in RCOOH (for Tables S2, S3, S6 and S7 below)

| Bond type                                                                                     | Mayer BO | FBO   |
|-----------------------------------------------------------------------------------------------|----------|-------|
| <b>CH<sub>3</sub>COOH</b>                                                                     |          |       |
| C4–O3                                                                                         | 2.059    | 2.038 |
| C4–O2                                                                                         | 1.169    | 1.376 |
| <b>C<sub>6</sub>H<sub>5</sub>COOH</b>                                                         |          |       |
| C12–O13                                                                                       | 2.041    | 2.002 |
| C12–O14                                                                                       | 1.205    | 1.364 |
| <b>[1,2-B<sub>12</sub>H<sub>10</sub>O<sub>2</sub>CCH<sub>3</sub>]<sup>–</sup></b>             |          |       |
| C25–O24                                                                                       | 1.410    | 1.584 |
| C25–O23                                                                                       | 1.420    | 1.589 |
| B2–O24                                                                                        | 0.638    | 0.850 |
| B19–O23                                                                                       | 0.648    | 0.853 |
| <b>[1,2-B<sub>12</sub>H<sub>10</sub>O<sub>2</sub>CC<sub>6</sub>H<sub>5</sub>]<sup>–</sup></b> |          |       |
| C25–O24                                                                                       | 1.336    | 1.563 |
| C25–O23                                                                                       | 1.339    | 1.565 |
| B2–O24                                                                                        | 0.633    | 0.847 |
| B19–O23                                                                                       | 0.634    | 0.850 |

**Table S2.** The bond order (BO) values for selected bonds in RCOOH and [1,2-B<sub>12</sub>H<sub>10</sub>O<sub>2</sub>CR]<sup>–</sup>

| <b>CH<sub>3</sub>COOH</b> |        | <b>C<sub>6</sub>H<sub>5</sub>COOH</b> |        | <b>[1,2-B<sub>12</sub>H<sub>10</sub>O<sub>2</sub>CCH<sub>3</sub>]<sup>–</sup></b> |        | <b>[1,2-B<sub>12</sub>H<sub>10</sub>O<sub>2</sub>CC<sub>6</sub>H<sub>5</sub>]<sup>–</sup></b> |        |
|---------------------------|--------|---------------------------------------|--------|-----------------------------------------------------------------------------------|--------|-----------------------------------------------------------------------------------------------|--------|
| C4                        | 0.218  | C12                                   | 0.210  | C25                                                                               | 0.274  | C25                                                                                           | 0.265  |
| O3                        | –0.289 | O13                                   | –0.282 | O24                                                                               | –0.101 | O24                                                                                           | –0.091 |
| O2                        | –0.180 | O14                                   | –0.168 | O23                                                                               | –0.099 | O23                                                                                           | –0.092 |

**Table S3.** The Hirshfeld charges for RCOOH and [1,2-B<sub>12</sub>H<sub>10</sub>O<sub>2</sub>CR]<sup>–</sup>



| Model structure                                                                                   | NICS(0) | NICS(1) |
|---------------------------------------------------------------------------------------------------|---------|---------|
| [1,2-B <sub>12</sub> H <sub>10</sub> O <sub>2</sub> CCH <sub>3</sub> ] <sup>-</sup>               | -4.469  | -4.234  |
| [1,2-B <sub>12</sub> H <sub>10</sub> O <sub>2</sub> CC <sub>6</sub> H <sub>5</sub> ] <sup>-</sup> | -3.943  | -4.118  |

**Table S4.** NICS(0) and NICS(1) values of [1,2-B<sub>12</sub>H<sub>10</sub>O<sub>2</sub>CR]<sup>-</sup> in ppm ( $\omega$ B97X-D3/def2-TZVPP level of theory)

*Analysis of molecular orbitals.*

MO analysis can be a useful, and visual, approach for understanding the structural features of borylated organic heterocycles. The canonical molecular orbitals of [1,2-B<sub>12</sub>H<sub>10</sub>O<sub>2</sub>CR]<sup>-</sup> were considered. Orbital composition analysis was carried out using the Mulliken and Stout-Politzer partitions. Orbitals were selected based on cross-term values between two molecular fragments, (the values reflecting the contribution to chemical bonding between the fragments). In the compounds studied, as in the classical examples of carboxonium ions, an empty p-orbital of carbon overlapped with an oxygen electron pair. The orbitals corresponding to this interaction were the HOMO-23, HOMO-16 of [1,2-B<sub>12</sub>H<sub>10</sub>O<sub>2</sub>CCH<sub>3</sub>]<sup>-</sup> and the HOMO-30, HOMO-22 of [1,2-B<sub>12</sub>H<sub>10</sub>O<sub>2</sub>CC<sub>6</sub>H<sub>5</sub>]<sup>-</sup>. In addition, the interactions between the R substituents and O<sub>2</sub>C-fragments were also observed. The HOMO-23 consisted of 37% oxygen p-orbitals (the sum of O1 and O2), 25% the p-orbital of C1, 14% the p-orbital of C2 and 9% the s-orbitals of three hydrogen atoms of the substituent (**Figure 2**). The HOMO-30 consisted of 47% oxygen p-orbitals (the sum of O1 and O2), 27% the p-orbital of C1 and 4% the p-orbital of C2. The remaining carbon atoms of the benzene ring contributed no more than 1% to this MO. The HOMO-23 and HOMO-30 had a bonding character for the interactions between the R substituents and O<sub>2</sub>C-fragments. The cross-term values were equal to 7.9% (HOMO-23) and 4.4% (HOMO-30).

The HOMO-16 and HOMO-22 also contained the delocalised  $\pi$ -system of the O<sub>2</sub>C-fragment, but the interaction with the R substituent had an antibonding character (**Figure 3**). The corresponding cross-values were equal to -4.9% (HOMO-16) and -1.6% (HOMO-22). In addition, interaction with the boron cage, which also had an antibonding character, was observed. In this case, the cross-term values were -8.7% (HOMO-16) and -6.7% (HOMO-22). The composition of the HOMO-16 was as follows: 17% p-orbitals of oxygen (the sum of O1 and O2), 6% the p-orbital of C1, 8% the p-orbital of C2 and 8% the s-orbitals of three hydrogen atoms. The B-H cluster fragments (consisting of only s-orbitals) contributed to this MO of 46%, (the sum of B3(7%)-H(4%), B6(7%)-H(4%) and B9(8%)-H(4%), B11(8%)-H(4%)). The HOMO-22 consisted of 9% oxygen p-orbitals (the sum of O1 and O2), 5% the p-orbital of C1 and 28% the p-orbitals from the C2-C7 atoms of the benzene ring (C2(1%), C3+C7(7%), C4+C6(13%) and C5(7%)). The contribution of the B-H fragments was close to the corresponding values for the HOMO-16 and differed by approximately 1% for all atoms.

The next MOs considered were formed by sigma overlaps between orbitals of the *exo*-polyhedral substituent and cluster. The HOMO-29 and HOMO-37 had a bonding character for the B<sub>12</sub>H<sub>10</sub>-O<sub>2</sub>C interaction (**Figure 4**). The cross-term values were equal to 8.0% (HOMO-29) and 3.4% (HOMO-37). These MOs included overlaps between the p-orbitals of O1, O2, the s-orbital of C1 and sp-hybrids of the B1, B2 atoms. For the HOMO-29, the composition was as follows: 35% corresponding to the sum of O1

and O2, 13% C1 and 10% the sum of B1 and B2. For the HOMO-37, there was a reduction in the contributions of the atoms in the B<sub>2</sub>O<sub>2</sub>C-fragment. The values were equal to 16% (O1+O2), 5% (C1) and 5% (B1+B2). It may be concluded that this type of MO is beneficial for the B<sub>12</sub>H<sub>10</sub>-O<sub>2</sub>C interaction only in the case of [1,2-B<sub>12</sub>H<sub>10</sub>O<sub>2</sub>CCH<sub>3</sub>]<sup>-</sup>.

The most beneficial MOs for the B<sub>12</sub>H<sub>10</sub>-O<sub>2</sub>C interaction were the HOMO-28 and HOMO-36 (**Figure 5**). These MOs had the largest cross-term values among all MOs (10.8% for the HOMO-28 and 8.9% for the HOMO-36). More cluster atoms were involved in the interaction and the C1 overlapped, with its p-orbital, with O1, O2. For the boron atoms, atomic s-orbitals of the unsubstituted positions and sp-hybrids (with a predominance of s-orbital) of the B1, B2 positions were involved. The HOMO-28 consisted of 34% oxygen (the sum of O1 and O2), 9% C1, 14% the substituted positions (the sum of B1 and B2) and 26% the unsubstituted positions (the sum of B4, B5, B7 and B8). In the case of the HOMO-36, the contribution of the O<sub>2</sub>C-fragment decreased, while the contribution of B4, B5, B7 and B8 increased slightly. The corresponding values were equal to 27% (O1, O2), 7% (C1) and 29% (B4, B5, B7 and B8). The B1, B2 contribution remained the same as for the HOMO-28. The HOMO-25 and HOMO-32 were also the bonding MO for the B<sub>12</sub>H<sub>10</sub>-O<sub>2</sub>C interaction (**Figure 5**). In this case, the B1, B2 positions overlapped by sp-hybrids, but with a predominance of the p-orbital. For the unsubstituted boron atoms, atomic s-orbitals of the B4, B5, B7 and B8, and sp-hybrids (with a predominance of s-orbital) of the B10, B12 positions, were involved. The cross-term values of these MO were equal to 3.4% (HOMO-25) and 4.1% (HOMO-32). The HOMO-25 was composed of 27% (the sum of O1, O2), 8% (C1), 40% (the sum of B1, B2 and B4, B5, B7, B8) and 9% (the sum of B10, B12). For the HOMO-32, the oxygen contribution increased to 29%, while the contribution of C1 remained the same. The boron contribution slightly decreased to 36% (for the B1, B2 and the B4, B5, B7, B8) and 8% (for the B10, B12).

| Model structure                                                                               | Type of interaction                                                            | № Orbital | Cross-term value, % |
|-----------------------------------------------------------------------------------------------|--------------------------------------------------------------------------------|-----------|---------------------|
| <b>[1,2-B<sub>12</sub>H<sub>10</sub>O<sub>2</sub>CCH<sub>3</sub>]<sup>-</sup></b>             | O <sub>2</sub> C-CH <sub>3</sub>                                               | HOMO-23   | 7.9                 |
|                                                                                               |                                                                                | HOMO-16   | -4.9                |
| <b>[1,2-B<sub>12</sub>H<sub>10</sub>O<sub>2</sub>CC<sub>6</sub>H<sub>5</sub>]<sup>-</sup></b> | B <sub>12</sub> H <sub>10</sub> -O <sub>2</sub> CCH <sub>3</sub>               | HOMO-29   | 8.0                 |
|                                                                                               |                                                                                | HOMO-28   | 10.8                |
|                                                                                               |                                                                                | HOMO-25   | 3.4                 |
|                                                                                               |                                                                                | HOMO-16   | -8.7                |
|                                                                                               |                                                                                |           |                     |
| <b>[1,2-B<sub>12</sub>H<sub>10</sub>O<sub>2</sub>CC<sub>6</sub>H<sub>5</sub>]<sup>-</sup></b> | O <sub>2</sub> C-C <sub>6</sub> H <sub>5</sub>                                 | HOMO-30   | 4.4                 |
|                                                                                               |                                                                                | HOMO-22   | -1.6                |
|                                                                                               | B <sub>12</sub> H <sub>10</sub> -O <sub>2</sub> CC <sub>6</sub> H <sub>5</sub> | HOMO-37   | 3.4                 |
|                                                                                               |                                                                                | HOMO-36   | 8.9                 |
|                                                                                               |                                                                                | HOMO-32   | 4.1                 |
|                                                                                               |                                                                                | HOMO-22   | -6.7                |

**Table S5.** The cross-term values of selected occupied orbitals in [1,2-B<sub>12</sub>H<sub>10</sub>O<sub>2</sub>CR]<sup>-</sup>

| Model structure                                                                   | № Orbital | Approach | № Atom | Shell Type | Contribution, % |
|-----------------------------------------------------------------------------------|-----------|----------|--------|------------|-----------------|
| <b>[1,2-B<sub>12</sub>H<sub>10</sub>O<sub>2</sub>CCH<sub>3</sub>]<sup>-</sup></b> | HOMO-29   | Mulliken | 2B     | S          | 1.58            |
|                                                                                   |           |          | 2B     | S          | 4.88            |
|                                                                                   |           |          | 2B     | S          | -2.95           |
|                                                                                   |           |          | 2B     | P          | 1.08            |
|                                                                                   |           |          | 2B     | P          | 1.16            |
|                                                                                   |           |          | 5B     | S          | 1.08            |
|                                                                                   |           |          | 5B     | S          | 1.64            |
|                                                                                   |           |          | 7B     | S          | 0.70            |
|                                                                                   |           |          | 7B     | S          | 1.45            |
|                                                                                   |           |          | 7B     | S          | -0.72           |
|                                                                                   |           |          | 9B     | P          | 0.57            |
|                                                                                   |           |          | 11B    | P          | 0.57            |
|                                                                                   |           |          | 13B    | S          | 0.70            |
|                                                                                   |           |          | 13B    | S          | 1.51            |
|                                                                                   |           |          | 13B    | S          | -0.83           |
|                                                                                   |           |          | 15B    | S          | 1.08            |
|                                                                                   |           |          | 15B    | S          | 1.67            |
|                                                                                   |           |          | 19B    | S          | 1.54            |
|                                                                                   |           |          | 19B    | S          | 4.67            |
| 19B                                                                               | S         | -2.84    |        |            |                 |
| 19B                                                                               | P         | 1.06     |        |            |                 |

|  |         |                |     |   |       |
|--|---------|----------------|-----|---|-------|
|  |         |                | 19B | P | 1.02  |
|  |         |                | 23O | S | 0.72  |
|  |         |                | 23O | S | 1.33  |
|  |         |                | 23O | S | 0.85  |
|  |         |                | 23O | P | 6.04  |
|  |         |                | 23O | P | 6.62  |
|  |         |                | 23O | P | 1.75  |
|  |         |                | 24O | S | 0.75  |
|  |         |                | 24O | S | 1.38  |
|  |         |                | 24O | S | 0.86  |
|  |         |                | 24O | P | 6.30  |
|  |         |                | 24O | P | 6.90  |
|  |         |                | 24O | P | 1.77  |
|  |         |                | 25C | S | 7.03  |
|  |         |                | 25C | S | 6.35  |
|  |         |                | 26C | S | 3.22  |
|  |         |                | 26C | S | 4.65  |
|  |         |                | 26C | S | 0.88  |
|  |         |                | 26C | P | 2.65  |
|  |         |                | 26C | P | 1.68  |
|  |         |                | 26C | P | 0.60  |
|  |         |                | 27H | S | 1.02  |
|  |         |                | 27H | S | 2.01  |
|  |         |                | 28H | S | 1.00  |
|  |         |                | 28H | S | 2.12  |
|  |         |                | 29H | S | 1.02  |
|  |         |                | 29H | S | 1.91  |
|  |         |                |     |   |       |
|  | HOMO-29 | Stout-Politzer | 1B  | S | 0.57  |
|  |         |                | 2B  | S | 0.90  |
|  |         |                | 2B  | S | 8.66  |
|  |         |                | 2B  | S | -6.94 |
|  |         |                | 2B  | P | 1.08  |
|  |         |                | 2B  | P | 1.68  |
|  |         |                | 3B  | S | 0.56  |
|  |         |                | 5B  | S | 1.11  |
|  |         |                | 5B  | S | 1.96  |
|  |         |                | 7B  | S | 0.64  |
|  |         |                | 7B  | S | 1.99  |
|  |         |                | 7B  | S | -0.70 |
|  |         |                | 9B  | S | 0.76  |

|  |         |          |     |   |       |
|--|---------|----------|-----|---|-------|
|  |         |          | 11B | S | 0.71  |
|  |         |          | 13B | S | 0.64  |
|  |         |          | 13B | S | 2.13  |
|  |         |          | 13B | S | -0.95 |
|  |         |          | 15B | S | 1.13  |
|  |         |          | 15B | S | 2.03  |
|  |         |          | 17B | S | 0.62  |
|  |         |          | 19B | S | 0.84  |
|  |         |          | 19B | S | 8.25  |
|  |         |          | 19B | S | -6.69 |
|  |         |          | 19B | P | 1.05  |
|  |         |          | 19B | P | 1.39  |
|  |         |          | 20B | S | 0.57  |
|  |         |          | 23O | S | 0.81  |
|  |         |          | 23O | S | 3.01  |
|  |         |          | 23O | S | 1.79  |
|  |         |          | 23O | P | 6.28  |
|  |         |          | 23O | P | 5.40  |
|  |         |          | 24O | S | 0.83  |
|  |         |          | 24O | S | 3.10  |
|  |         |          | 24O | S | 1.76  |
|  |         |          | 24O | P | 6.60  |
|  |         |          | 24O | P | 5.73  |
|  |         |          | 25C | S | 0.85  |
|  |         |          | 25C | S | 5.23  |
|  |         |          | 25C | S | 3.66  |
|  |         |          | 26C | S | 4.29  |
|  |         |          | 26C | S | 8.62  |
|  |         |          | 26C | S | 0.67  |
|  |         |          | 26C | P | 2.64  |
|  |         |          | 26C | P | 0.65  |
|  |         |          | 27H | S | 0.77  |
|  |         |          | 27H | S | 2.01  |
|  |         |          | 28H | S | 0.71  |
|  |         |          | 28H | S | 2.17  |
|  |         |          | 29H | S | 0.88  |
|  |         |          | 29H | S | 2.01  |
|  |         |          |     |   |       |
|  | HOMO-28 | Mulliken | 1B  | S | 2.08  |
|  |         |          | 1B  | S | 4.32  |
|  |         |          | 1B  | S | -1.26 |

|  |  |  |     |   |       |
|--|--|--|-----|---|-------|
|  |  |  | 2B  | S | 3.70  |
|  |  |  | 2B  | S | 4.82  |
|  |  |  | 2B  | S | -4.67 |
|  |  |  | 2B  | P | 0.76  |
|  |  |  | 2B  | P | 1.93  |
|  |  |  | 3B  | S | 2.07  |
|  |  |  | 3B  | S | 4.39  |
|  |  |  | 3B  | S | -1.25 |
|  |  |  | 5B  | S | 0.56  |
|  |  |  | 5B  | S | 0.76  |
|  |  |  | 5B  | P | 0.57  |
|  |  |  | 7B  | P | 0.74  |
|  |  |  | 9B  | P | 0.76  |
|  |  |  | 9B  | P | 1.42  |
|  |  |  | 11B | P | 0.76  |
|  |  |  | 11B | P | 1.43  |
|  |  |  | 13B | P | 0.74  |
|  |  |  | 15B | S | 0.55  |
|  |  |  | 15B | S | 0.74  |
|  |  |  | 15B | P | 0.56  |
|  |  |  | 17B | S | 2.09  |
|  |  |  | 17B | S | 4.38  |
|  |  |  | 17B | S | -1.14 |
|  |  |  | 19B | S | 3.74  |
|  |  |  | 19B | S | 4.95  |
|  |  |  | 19B | S | -4.83 |
|  |  |  | 19B | P | 0.79  |
|  |  |  | 19B | P | 1.89  |
|  |  |  | 20B | S | 2.08  |
|  |  |  | 20B | S | 4.37  |
|  |  |  | 20B | S | -1.10 |
|  |  |  | 23O | P | 6.82  |
|  |  |  | 23O | P | 7.31  |
|  |  |  | 23O | P | 2.00  |
|  |  |  | 24O | P | 6.67  |
|  |  |  | 24O | P | 7.13  |
|  |  |  | 24O | P | 2.07  |
|  |  |  | 25C | P | 6.18  |
|  |  |  | 25C | P | 3.03  |
|  |  |  | 26C | P | 0.64  |
|  |  |  | 26C | P | 0.70  |

|  |         |                |     |   |       |
|--|---------|----------------|-----|---|-------|
|  |         |                |     |   |       |
|  | HOMO-28 | Stout-Politzer | 1B  | S | 2.14  |
|  |         |                | 1B  | S | 6.23  |
|  |         |                | 1B  | S | -1.02 |
|  |         |                | 2B  | S | 4.81  |
|  |         |                | 2B  | S | 7.48  |
|  |         |                | 2B  | S | -8.57 |
|  |         |                | 2B  | P | 0.60  |
|  |         |                | 2B  | P | 2.07  |
|  |         |                | 3B  | S | 2.09  |
|  |         |                | 3B  | S | 6.35  |
|  |         |                | 3B  | S | -0.98 |
|  |         |                | 5B  | S | 0.57  |
|  |         |                | 9B  | P | 0.60  |
|  |         |                | 9B  | P | 0.81  |
|  |         |                | 11B | P | 0.59  |
|  |         |                | 11B | P | 0.83  |
|  |         |                | 15B | S | 0.54  |
|  |         |                | 17B | S | 2.12  |
|  |         |                | 17B | S | 6.35  |
|  |         |                | 17B | S | -0.82 |
|  |         |                | 19B | S | 4.86  |
|  |         |                | 19B | S | 7.79  |
|  |         |                | 19B | S | -9.10 |
|  |         |                | 19B | P | 0.64  |
|  |         |                | 19B | P | 2.18  |
|  |         |                | 20B | S | 2.12  |
|  |         |                | 20B | S | 6.37  |
|  |         |                | 20B | S | -0.79 |
|  |         |                | 23O | S | 0.83  |
|  |         |                | 23O | P | 7.64  |
|  |         |                | 23O | P | 7.75  |
|  |         |                | 23O | P | 1.06  |
|  |         |                | 24O | S | 0.84  |
|  |         |                | 24O | P | 7.47  |
|  |         |                | 24O | P | 7.50  |
|  |         |                | 24O | P | 1.12  |
|  |         |                | 25C | P | 7.40  |
|  |         |                | 25C | P | 1.73  |
|  |         |                | 26C | P | 0.74  |
|  |         |                | 26C | P | 0.52  |

|  |         |          |     |   |       |
|--|---------|----------|-----|---|-------|
|  |         |          |     |   |       |
|  | HOMO-25 | Mulliken | 1B  | S | 2.97  |
|  |         |          | 1B  | S | 4.76  |
|  |         |          | 1B  | S | -2.17 |
|  |         |          | 1B  | P | 0.51  |
|  |         |          | 1B  | P | 0.52  |
|  |         |          | 2B  | S | 1.98  |
|  |         |          | 2B  | P | 2.67  |
|  |         |          | 2B  | P | 1.28  |
|  |         |          | 3B  | S | 2.99  |
|  |         |          | 3B  | S | 4.70  |
|  |         |          | 3B  | S | -2.17 |
|  |         |          | 3B  | P | 0.51  |
|  |         |          | 3B  | P | 0.52  |
|  |         |          | 5B  | S | 1.39  |
|  |         |          | 5B  | S | 2.39  |
|  |         |          | 5B  | S | -0.81 |
|  |         |          | 5B  | P | 0.72  |
|  |         |          | 5B  | P | 0.63  |
|  |         |          | 7B  | P | 0.82  |
|  |         |          | 7B  | P | 0.80  |
|  |         |          | 13B | P | 0.82  |
|  |         |          | 13B | P | 0.79  |
|  |         |          | 15B | S | 1.45  |
|  |         |          | 15B | S | 2.48  |
|  |         |          | 15B | S | -0.80 |
|  |         |          | 15B | P | 0.71  |
|  |         |          | 15B | P | 0.62  |
|  |         |          | 17B | S | 2.97  |
|  |         |          | 17B | S | 4.78  |
|  |         |          | 17B | S | -2.32 |
|  |         |          | 17B | P | 0.51  |
|  |         |          | 17B | P | 0.53  |
|  |         |          | 19B | S | 1.95  |
|  |         |          | 19B | P | 2.65  |
|  |         |          | 19B | P | 1.39  |
|  |         |          | 20B | S | 2.97  |
|  |         |          | 20B | S | 4.62  |
|  |         |          | 20B | S | -2.31 |
|  |         |          | 20B | P | 0.51  |
|  |         |          | 20B | P | 0.50  |



|  |         |                |     |   |       |
|--|---------|----------------|-----|---|-------|
|  |         |                | 22H | S | 0.50  |
|  |         |                | 23O | S | 0.62  |
|  |         |                | 23O | P | 5.51  |
|  |         |                | 23O | P | 5.65  |
|  |         |                | 23O | P | 0.93  |
|  |         |                | 24O | S | 0.62  |
|  |         |                | 24O | P | 5.51  |
|  |         |                | 24O | P | 5.62  |
|  |         |                | 24O | P | 0.99  |
|  |         |                | 25C | P | 4.97  |
|  |         |                | 25C | P | 2.47  |
|  |         |                | 26C | P | 0.99  |
|  |         |                | 26C | P | 1.01  |
|  |         |                | 28H | S | 0.55  |
|  |         |                |     |   |       |
|  | HOMO-25 | Stout-Politzer | 1B  | S | 2.94  |
|  |         |                | 1B  | S | 5.84  |
|  |         |                | 1B  | S | -1.86 |
|  |         |                | 2B  | S | 2.23  |
|  |         |                | 2B  | P | 2.98  |
|  |         |                | 2B  | P | 1.51  |
|  |         |                | 3B  | S | 3.04  |
|  |         |                | 3B  | S | 5.78  |
|  |         |                | 3B  | S | -1.88 |
|  |         |                | 5B  | S | 1.25  |
|  |         |                | 5B  | S | 2.71  |
|  |         |                | 5B  | S | -0.54 |
|  |         |                | 7B  | P | 0.66  |
|  |         |                | 13B | P | 0.68  |
|  |         |                | 15B | S | 1.37  |
|  |         |                | 15B | S | 2.93  |
|  |         |                | 15B | S | -0.61 |
|  |         |                | 17B | S | 2.98  |
|  |         |                | 17B | S | 5.93  |
|  |         |                | 17B | S | -2.17 |
|  |         |                | 19B | S | 2.27  |
|  |         |                | 19B | P | 2.92  |
|  |         |                | 19B | P | 1.69  |
|  |         |                | 20B | S | 3.10  |
|  |         |                | 20B | S | 5.75  |
|  |         |                | 20B | S | -2.24 |

|  |         |          |     |   |       |
|--|---------|----------|-----|---|-------|
|  |         |          | 23O | S | 1.25  |
|  |         |          | 23O | P | 6.15  |
|  |         |          | 23O | P | 6.01  |
|  |         |          | 24O | S | 1.28  |
|  |         |          | 24O | S | 0.55  |
|  |         |          | 24O | P | 6.16  |
|  |         |          | 24O | P | 5.97  |
|  |         |          | 25C | P | 5.87  |
|  |         |          | 25C | P | 1.46  |
|  |         |          | 26C | P | 1.21  |
|  |         |          | 26C | P | 0.89  |
|  |         |          | 28H | S | 0.56  |
|  |         |          |     |   |       |
|  | HOMO-23 | Mulliken | 2B  | P | 0.71  |
|  |         |          | 2B  | P | -0.64 |
|  |         |          | 7B  | S | 0.93  |
|  |         |          | 7B  | S | 2.37  |
|  |         |          | 7B  | S | -1.36 |
|  |         |          | 9B  | P | 0.52  |
|  |         |          | 9B  | P | 1.39  |
|  |         |          | 11B | P | 0.52  |
|  |         |          | 11B | P | 1.32  |
|  |         |          | 13B | S | 0.93  |
|  |         |          | 13B | S | 2.32  |
|  |         |          | 13B | S | -1.45 |
|  |         |          | 19B | P | 0.79  |
|  |         |          | 19B | P | -0.62 |
|  |         |          | 23O | P | 6.73  |
|  |         |          | 23O | P | 7.64  |
|  |         |          | 23O | P | 4.12  |
|  |         |          | 24O | P | 6.62  |
|  |         |          | 24O | P | 7.53  |
|  |         |          | 24O | P | 3.95  |
|  |         |          | 25C | P | 9.97  |
|  |         |          | 25C | P | 12.63 |
|  |         |          | 25C | P | 2.62  |
|  |         |          | 26C | P | 5.50  |
|  |         |          | 26C | P | 5.98  |
|  |         |          | 26C | P | 2.07  |
|  |         |          | 27H | S | 1.11  |
|  |         |          | 27H | S | 2.07  |

|  |         |                |     |   |       |
|--|---------|----------------|-----|---|-------|
|  |         |                | 29H | S | 1.51  |
|  |         |                | 29H | S | 2.72  |
|  |         |                | 29H | S | 0.58  |
|  |         |                |     |   |       |
|  | HOMO-23 | Stout-Polizter | 1B  | S | 0.52  |
|  |         |                | 1B  | S | -0.63 |
|  |         |                | 3B  | S | 0.53  |
|  |         |                | 3B  | S | -0.93 |
|  |         |                | 7B  | S | 1.09  |
|  |         |                | 7B  | S | 4.01  |
|  |         |                | 7B  | S | -2.44 |
|  |         |                | 9B  | P | 0.52  |
|  |         |                | 9B  | P | 1.48  |
|  |         |                | 11B | P | 0.51  |
|  |         |                | 11B | P | 1.11  |
|  |         |                | 13B | S | 1.10  |
|  |         |                | 13B | S | 4.08  |
|  |         |                | 13B | S | -2.88 |
|  |         |                | 17B | S | 0.56  |
|  |         |                | 17B | S | -0.51 |
|  |         |                | 20B | S | 0.58  |
|  |         |                | 20B | S | -0.71 |
|  |         |                | 23O | P | 7.48  |
|  |         |                | 23O | P | 8.17  |
|  |         |                | 23O | P | 2.79  |
|  |         |                | 24O | P | 7.38  |
|  |         |                | 24O | P | 8.06  |
|  |         |                | 24O | P | 2.60  |
|  |         |                | 25C | P | 11.90 |
|  |         |                | 25C | P | 15.24 |
|  |         |                | 25C | P | 0.97  |
|  |         |                | 26C | P | 6.57  |
|  |         |                | 26C | P | 6.12  |
|  |         |                | 26C | P | 0.84  |
|  |         |                | 27H | S | 0.88  |
|  |         |                | 27H | S | 2.38  |
|  |         |                | 29H | S | 1.16  |
|  |         |                | 29H | S | 2.69  |
|  |         |                |     |   |       |
|  | HOMO-16 | Mulliken       | 1B  | P | 0.65  |
|  |         |                | 1B  | P | 0.53  |

|  |  |  |     |   |       |
|--|--|--|-----|---|-------|
|  |  |  | 2B  | P | 1.25  |
|  |  |  | 3B  | P | 0.63  |
|  |  |  | 3B  | P | 0.53  |
|  |  |  | 5B  | P | 1.66  |
|  |  |  | 5B  | P | 0.83  |
|  |  |  | 7B  | S | 2.09  |
|  |  |  | 7B  | S | 6.78  |
|  |  |  | 7B  | S | -1.07 |
|  |  |  | 7B  | P | 0.75  |
|  |  |  | 7B  | P | -0.99 |
|  |  |  | 7B  | P | 0.57  |
|  |  |  | 8H  | S | 0.82  |
|  |  |  | 8H  | S | 2.13  |
|  |  |  | 8H  | S | 1.02  |
|  |  |  | 9B  | S | 2.12  |
|  |  |  | 9B  | S | 5.59  |
|  |  |  | 9B  | P | 0.56  |
|  |  |  | 9B  | P | -0.80 |
|  |  |  | 10H | S | 0.80  |
|  |  |  | 10H | S | 2.03  |
|  |  |  | 10H | S | 1.00  |
|  |  |  | 11B | S | 2.16  |
|  |  |  | 11B | S | 5.59  |
|  |  |  | 11B | P | 0.55  |
|  |  |  | 11B | P | -0.79 |
|  |  |  | 12H | S | 0.81  |
|  |  |  | 12H | S | 2.09  |
|  |  |  | 12H | S | 1.00  |
|  |  |  | 13B | S | 2.10  |
|  |  |  | 13B | S | 6.55  |
|  |  |  | 13B | S | -0.99 |
|  |  |  | 13B | P | 0.77  |
|  |  |  | 13B | P | -0.84 |
|  |  |  | 13B | P | 0.55  |
|  |  |  | 14H | S | 0.81  |
|  |  |  | 14H | S | 2.08  |
|  |  |  | 14H | S | 1.01  |
|  |  |  | 15B | P | 1.76  |
|  |  |  | 15B | P | 0.89  |
|  |  |  | 15B | P | 0.51  |
|  |  |  | 17B | P | 0.65  |

|  |         |                |     |   |       |
|--|---------|----------------|-----|---|-------|
|  |         |                | 19B | P | 1.24  |
|  |         |                | 20B | P | 0.66  |
|  |         |                | 20B | P | 0.51  |
|  |         |                | 23O | P | 3.22  |
|  |         |                | 23O | P | 3.17  |
|  |         |                | 23O | P | 0.91  |
|  |         |                | 24O | P | 3.93  |
|  |         |                | 24O | P | 3.88  |
|  |         |                | 24O | P | 1.22  |
|  |         |                | 25C | P | 2.91  |
|  |         |                | 25C | P | 2.63  |
|  |         |                | 26C | P | 3.65  |
|  |         |                | 26C | P | 3.42  |
|  |         |                | 26C | P | 0.87  |
|  |         |                | 27H | S | 0.99  |
|  |         |                | 27H | S | 1.49  |
|  |         |                | 29H | S | 1.61  |
|  |         |                | 29H | S | 2.65  |
|  |         |                | 29H | S | 0.61  |
|  |         |                |     |   |       |
|  | HOMO-16 | Stout-Politzer | 2B  | P | 0.95  |
|  |         |                | 5B  | P | 1.48  |
|  |         |                | 7B  | S | 1.43  |
|  |         |                | 7B  | S | 9.67  |
|  |         |                | 7B  | S | -0.99 |
|  |         |                | 8H  | S | 1.67  |
|  |         |                | 9B  | S | 1.38  |
|  |         |                | 9B  | S | 7.99  |
|  |         |                | 10H | S | 1.49  |
|  |         |                | 11B | S | 1.43  |
|  |         |                | 11B | S | 8.04  |
|  |         |                | 12H | S | 1.47  |
|  |         |                | 13B | S | 1.54  |
|  |         |                | 13B | S | 9.54  |
|  |         |                | 13B | S | -0.91 |
|  |         |                | 13B | P | 0.50  |
|  |         |                | 14H | S | 0.51  |
|  |         |                | 14H | S | 1.75  |
|  |         |                | 14H | S | 0.58  |
|  |         |                | 15B | P | 1.61  |
|  |         |                | 19B | P | 0.92  |

|                                                                                               |         |          |     |   |       |
|-----------------------------------------------------------------------------------------------|---------|----------|-----|---|-------|
|                                                                                               |         |          | 23O | P | 3.59  |
|                                                                                               |         |          | 23O | P | 3.46  |
|                                                                                               |         |          | 23O | P | 0.66  |
|                                                                                               |         |          | 24O | P | 4.41  |
|                                                                                               |         |          | 24O | P | 4.27  |
|                                                                                               |         |          | 24O | P | 0.91  |
|                                                                                               |         |          | 25C | P | 3.26  |
|                                                                                               |         |          | 25C | P | 2.70  |
|                                                                                               |         |          | 26C | P | 4.36  |
|                                                                                               |         |          | 26C | P | 3.82  |
|                                                                                               |         |          | 27H | S | 0.86  |
|                                                                                               |         |          | 27H | S | 1.71  |
|                                                                                               |         |          | 29H | S | 1.33  |
|                                                                                               |         |          | 29H | S | 3.05  |
|                                                                                               |         |          |     |   |       |
| <b>[1.2-B<sub>12</sub>H<sub>10</sub>O<sub>2</sub>CC<sub>6</sub>H<sub>5</sub>]<sup>-</sup></b> | HOMO-37 | Mulliken | 2B  | S | 0.89  |
|                                                                                               |         |          | 2B  | S | 2.30  |
|                                                                                               |         |          | 2B  | S | -1.17 |
|                                                                                               |         |          | 5B  | S | 0.59  |
|                                                                                               |         |          | 5B  | S | 0.94  |
|                                                                                               |         |          | 7B  | S | 0.82  |
|                                                                                               |         |          | 13B | S | 0.83  |
|                                                                                               |         |          | 13B | S | -0.52 |
|                                                                                               |         |          | 15B | S | 0.59  |
|                                                                                               |         |          | 15B | S | 0.94  |
|                                                                                               |         |          | 19B | S | 0.91  |
|                                                                                               |         |          | 19B | S | 2.33  |
|                                                                                               |         |          | 19B | S | -1.17 |
|                                                                                               |         |          | 23O | S | 0.52  |
|                                                                                               |         |          | 23O | P | 2.93  |
|                                                                                               |         |          | 23O | P | 3.13  |
|                                                                                               |         |          | 23O | P | 0.96  |
|                                                                                               |         |          | 24O | S | 0.52  |
|                                                                                               |         |          | 24O | P | 2.87  |
|                                                                                               |         |          | 24O | P | 3.07  |
|                                                                                               |         |          | 24O | P | 0.94  |
|                                                                                               |         |          | 25C | S | 2.52  |
|                                                                                               |         |          | 25C | S | 2.28  |
|                                                                                               |         |          | 26C | S | 3.22  |
|                                                                                               |         |          | 26C | S | 4.23  |
|                                                                                               |         |          | 26C | P | 1.37  |

|  |         |                |     |   |       |
|--|---------|----------------|-----|---|-------|
|  |         |                | 26C | P | 0.72  |
|  |         |                | 27C | P | 4.13  |
|  |         |                | 27C | P | 4.03  |
|  |         |                | 27C | P | 1.14  |
|  |         |                | 28C | P | 4.13  |
|  |         |                | 28C | P | 4.02  |
|  |         |                | 28C | P | 1.14  |
|  |         |                | 29C | S | 1.67  |
|  |         |                | 29C | S | 1.90  |
|  |         |                | 29C | S | 0.66  |
|  |         |                | 29C | P | 2.75  |
|  |         |                | 29C | P | 2.75  |
|  |         |                | 30C | S | 1.69  |
|  |         |                | 30C | S | 1.93  |
|  |         |                | 30C | S | 0.66  |
|  |         |                | 30C | P | 2.73  |
|  |         |                | 30C | P | 2.74  |
|  |         |                | 31C | S | 2.35  |
|  |         |                | 31C | S | 2.73  |
|  |         |                | 32H | S | 0.57  |
|  |         |                | 33H | S | 0.56  |
|  |         |                | 34H | S | 1.00  |
|  |         |                | 34H | S | 1.73  |
|  |         |                | 35H | S | 1.01  |
|  |         |                | 35H | S | 1.75  |
|  |         |                | 36H | S | 0.63  |
|  |         |                | 36H | S | 1.04  |
|  |         |                |     |   |       |
|  | HOMO-37 | Stout-Polizter | 2B  | S | 0.59  |
|  |         |                | 2B  | S | 3.58  |
|  |         |                | 2B  | S | -1.94 |
|  |         |                | 5B  | S | 0.62  |
|  |         |                | 5B  | S | 1.18  |
|  |         |                | 7B  | S | 1.14  |
|  |         |                | 7B  | S | -0.63 |
|  |         |                | 13B | S | 1.18  |
|  |         |                | 13B | S | -0.69 |
|  |         |                | 15B | S | 0.62  |
|  |         |                | 15B | S | 1.19  |
|  |         |                | 19B | S | 0.59  |
|  |         |                | 19B | S | 3.58  |

|  |         |          |     |   |       |
|--|---------|----------|-----|---|-------|
|  |         |          | 19B | S | -1.94 |
|  |         |          | 23O | S | 1.02  |
|  |         |          | 23O | S | 0.86  |
|  |         |          | 23O | P | 3.13  |
|  |         |          | 23O | P | 2.73  |
|  |         |          | 24O | S | 1.02  |
|  |         |          | 24O | S | 0.85  |
|  |         |          | 24O | P | 3.02  |
|  |         |          | 24O | P | 2.56  |
|  |         |          | 25C | S | 2.10  |
|  |         |          | 25C | S | 2.23  |
|  |         |          | 26C | S | 2.94  |
|  |         |          | 26C | S | 5.24  |
|  |         |          | 26C | P | 1.18  |
|  |         |          | 27C | S | 0.83  |
|  |         |          | 27C | P | 4.61  |
|  |         |          | 27C | P | 3.22  |
|  |         |          | 28C | S | 0.74  |
|  |         |          | 28C | P | 4.54  |
|  |         |          | 28C | P | 3.21  |
|  |         |          | 29C | S | 2.04  |
|  |         |          | 29C | S | 2.91  |
|  |         |          | 29C | S | 0.83  |
|  |         |          | 29C | P | 3.01  |
|  |         |          | 29C | P | 2.11  |
|  |         |          | 30C | S | 2.13  |
|  |         |          | 30C | S | 3.02  |
|  |         |          | 30C | S | 0.85  |
|  |         |          | 30C | P | 3.03  |
|  |         |          | 30C | P | 2.06  |
|  |         |          | 31C | S | 2.47  |
|  |         |          | 31C | S | 3.37  |
|  |         |          | 34H | S | 0.80  |
|  |         |          | 34H | S | 1.65  |
|  |         |          | 35H | S | 0.83  |
|  |         |          | 35H | S | 1.72  |
|  |         |          | 36H | S | 0.51  |
|  |         |          | 36H | S | 0.85  |
|  |         |          |     |   |       |
|  | HOMO-36 | Mulliken | 1B  | S | 2.38  |
|  |         |          | 1B  | S | 4.89  |



|  |  |  |     |   |       |
|--|--|--|-----|---|-------|
|  |  |  | 1B  | S | -1.29 |
|  |  |  | 2B  | S | 3.57  |
|  |  |  | 2B  | S | 4.82  |
|  |  |  | 2B  | S | -4.47 |
|  |  |  | 2B  | P | 0.71  |
|  |  |  | 2B  | P | 1.79  |
|  |  |  | 3B  | S | 2.41  |
|  |  |  | 3B  | S | 4.95  |
|  |  |  | 3B  | S | -1.37 |
|  |  |  | 5B  | S | 0.66  |
|  |  |  | 5B  | S | 0.89  |
|  |  |  | 5B  | P | 0.64  |
|  |  |  | 7B  | P | 0.84  |
|  |  |  | 9B  | P | 0.83  |
|  |  |  | 9B  | P | 1.44  |
|  |  |  | 11B | P | 0.83  |
|  |  |  | 11B | P | 1.46  |
|  |  |  | 13B | P | 0.84  |
|  |  |  | 15B | S | 0.68  |
|  |  |  | 15B | S | 0.91  |
|  |  |  | 15B | P | 0.64  |
|  |  |  | 17B | S | 2.43  |
|  |  |  | 17B | S | 4.94  |
|  |  |  | 17B | S | -1.33 |
|  |  |  | 19B | S | 3.52  |
|  |  |  | 19B | S | 4.82  |
|  |  |  | 19B | S | -4.50 |
|  |  |  | 19B | P | 0.73  |
|  |  |  | 19B | P | 1.82  |
|  |  |  | 20B | S | 2.39  |
|  |  |  | 20B | S | 4.92  |
|  |  |  | 20B | S | -1.32 |
|  |  |  | 23O | P | 5.54  |
|  |  |  | 23O | P | 5.88  |
|  |  |  | 23O | P | 1.63  |
|  |  |  | 24O | P | 5.56  |
|  |  |  | 24O | P | 5.90  |
|  |  |  | 24O | P | 1.64  |
|  |  |  | 25C | P | 5.02  |
|  |  |  | 25C | P | 2.17  |
|  |  |  | 31C | P | 0.57  |

|  |         |                |     |   |       |
|--|---------|----------------|-----|---|-------|
|  |         |                | 31C | P | 0.52  |
|  |         |                |     |   |       |
|  | HOMO-36 | Stout-Politzer | 1B  | S | 2.42  |
|  |         |                | 1B  | S | 6.98  |
|  |         |                | 1B  | S | -0.96 |
|  |         |                | 2B  | S | 4.54  |
|  |         |                | 2B  | S | 7.33  |
|  |         |                | 2B  | S | -7.87 |
|  |         |                | 2B  | P | 0.56  |
|  |         |                | 2B  | P | 1.82  |
|  |         |                | 3B  | S | 2.48  |
|  |         |                | 3B  | S | 7.11  |
|  |         |                | 3B  | S | -1.11 |
|  |         |                | 5B  | S | 0.70  |
|  |         |                | 9B  | P | 0.64  |
|  |         |                | 9B  | P | 0.79  |
|  |         |                | 11B | P | 0.64  |
|  |         |                | 11B | P | 0.81  |
|  |         |                | 15B | S | 0.51  |
|  |         |                | 15B | S | 0.69  |
|  |         |                | 17B | S | 2.51  |
|  |         |                | 17B | S | 7.11  |
|  |         |                | 17B | S | -1.04 |
|  |         |                | 19B | S | 4.41  |
|  |         |                | 19B | S | 7.34  |
|  |         |                | 19B | S | -8.04 |
|  |         |                | 19B | P | 0.58  |
|  |         |                | 19B | P | 1.95  |
|  |         |                | 20B | S | 2.43  |
|  |         |                | 20B | S | 7.07  |
|  |         |                | 20B | S | -1.00 |
|  |         |                | 23O | P | 6.24  |
|  |         |                | 23O | P | 6.19  |
|  |         |                | 23O | P | 0.77  |
|  |         |                | 24O | P | 6.14  |
|  |         |                | 24O | P | 5.97  |
|  |         |                | 24O | P | 0.78  |
|  |         |                | 25C | P | 5.95  |
|  |         |                | 25C | P | 0.93  |
|  |         |                | 27C | S | 0.61  |
|  |         |                | 28C | S | 0.63  |

|  |         |          |     |   |       |
|--|---------|----------|-----|---|-------|
|  |         |          | 31C | P | 0.72  |
|  |         |          | 31C | P | 0.54  |
|  |         |          |     |   |       |
|  | HOMO-32 | Mulliken | 1B  | S | 2.61  |
|  |         |          | 1B  | S | 4.13  |
|  |         |          | 1B  | S | -1.88 |
|  |         |          | 2B  | S | 1.52  |
|  |         |          | 2B  | P | 2.58  |
|  |         |          | 2B  | P | 1.38  |
|  |         |          | 3B  | S | 2.63  |
|  |         |          | 3B  | S | 4.11  |
|  |         |          | 3B  | S | -1.86 |
|  |         |          | 5B  | S | 1.28  |
|  |         |          | 5B  | S | 2.21  |
|  |         |          | 5B  | S | -0.74 |
|  |         |          | 5B  | P | 0.65  |
|  |         |          | 5B  | P | 0.54  |
|  |         |          | 7B  | P | 0.75  |
|  |         |          | 7B  | P | 0.66  |
|  |         |          | 13B | P | 0.75  |
|  |         |          | 13B | P | 0.65  |
|  |         |          | 15B | S | 1.31  |
|  |         |          | 15B | S | 2.23  |
|  |         |          | 15B | S | -0.74 |
|  |         |          | 15B | P | 0.65  |
|  |         |          | 15B | P | 0.54  |
|  |         |          | 17B | S | 2.63  |
|  |         |          | 17B | S | 4.14  |
|  |         |          | 17B | S | -1.87 |
|  |         |          | 19B | S | 1.48  |
|  |         |          | 19B | P | 2.57  |
|  |         |          | 19B | P | 1.37  |
|  |         |          | 20B | S | 2.61  |
|  |         |          | 20B | S | 4.10  |
|  |         |          | 20B | S | -1.82 |
|  |         |          | 23O | S | 0.58  |
|  |         |          | 23O | P | 6.09  |
|  |         |          | 23O | P | 6.19  |
|  |         |          | 23O | P | 1.03  |
|  |         |          | 24O | S | 0.61  |
|  |         |          | 24O | P | 6.14  |

|  |         |                |     |   |       |
|--|---------|----------------|-----|---|-------|
|  |         |                | 24O | P | 6.25  |
|  |         |                | 24O | P | 1.03  |
|  |         |                | 25C | P | 5.47  |
|  |         |                | 25C | P | 2.52  |
|  |         |                | 29C | P | 0.65  |
|  |         |                | 29C | P | 0.52  |
|  |         |                | 30C | P | 0.65  |
|  |         |                | 30C | P | 0.52  |
|  |         |                | 31C | P | 0.67  |
|  |         |                | 31C | P | 0.56  |
|  |         |                |     |   |       |
|  | HOMO-32 | Stout-Polizter | 1B  | S | 2.57  |
|  |         |                | 1B  | S | 5.01  |
|  |         |                | 1B  | S | -1.57 |
|  |         |                | 2B  | S | 1.50  |
|  |         |                | 2B  | P | 2.88  |
|  |         |                | 2B  | P | 1.61  |
|  |         |                | 3B  | S | 2.68  |
|  |         |                | 3B  | S | 5.06  |
|  |         |                | 3B  | S | -1.62 |
|  |         |                | 5B  | S | 1.18  |
|  |         |                | 5B  | S | 2.55  |
|  |         |                | 5B  | S | -0.53 |
|  |         |                | 7B  | P | 0.60  |
|  |         |                | 13B | P | 0.61  |
|  |         |                | 15B | S | 1.22  |
|  |         |                | 15B | S | 2.60  |
|  |         |                | 15B | S | -0.54 |
|  |         |                | 17B | S | 2.64  |
|  |         |                | 17B | S | 5.13  |
|  |         |                | 17B | S | -1.69 |
|  |         |                | 19B | S | 1.70  |
|  |         |                | 19B | P | 2.76  |
|  |         |                | 19B | P | 1.57  |
|  |         |                | 20B | S | 2.66  |
|  |         |                | 20B | S | 5.09  |
|  |         |                | 20B | S | -1.60 |
|  |         |                | 23O | S | 1.15  |
|  |         |                | 23O | S | 0.64  |
|  |         |                | 23O | P | 6.86  |
|  |         |                | 23O | P | 6.69  |

|  |         |                |     |   |       |
|--|---------|----------------|-----|---|-------|
|  |         |                | 24O | S | 1.23  |
|  |         |                | 24O | S | 0.69  |
|  |         |                | 24O | P | 6.80  |
|  |         |                | 24O | P | 6.50  |
|  |         |                | 24O | P | 0.50  |
|  |         |                | 25C | P | 6.40  |
|  |         |                | 25C | P | 1.29  |
|  |         |                | 29C | P | 0.75  |
|  |         |                | 30C | P | 0.79  |
|  |         |                | 31C | P | 0.85  |
|  |         |                | 31C | P | 0.62  |
|  |         |                |     |   |       |
|  | HOMO-30 | Mulliken       | 2B  | P | 1.27  |
|  |         |                | 2B  | P | -0.81 |
|  |         |                | 7B  | S | 1.16  |
|  |         |                | 7B  | S | 2.78  |
|  |         |                | 7B  | S | -1.68 |
|  |         |                | 9B  | P | 0.72  |
|  |         |                | 9B  | P | 1.83  |
|  |         |                | 11B | P | 0.71  |
|  |         |                | 11B | P | 1.90  |
|  |         |                | 13B | S | 1.23  |
|  |         |                | 13B | S | 2.99  |
|  |         |                | 13B | S | -1.90 |
|  |         |                | 19B | P | 1.28  |
|  |         |                | 19B | P | -0.81 |
|  |         |                | 23O | P | 8.43  |
|  |         |                | 23O | P | 9.50  |
|  |         |                | 23O | P | 5.06  |
|  |         |                | 24O | P | 8.40  |
|  |         |                | 24O | P | 9.47  |
|  |         |                | 24O | P | 5.04  |
|  |         |                | 25C | P | 10.69 |
|  |         |                | 25C | P | 13.06 |
|  |         |                | 25C | P | 2.96  |
|  |         |                | 26C | P | 1.48  |
|  |         |                | 26C | P | 2.19  |
|  |         |                | 26C | P | 0.67  |
|  |         |                |     |   |       |
|  | HOMO-30 | Stout-Politzer | 1B  | S | 0.70  |
|  |         |                | 1B  | S | -0.87 |

|  |         |          |     |   |       |
|--|---------|----------|-----|---|-------|
|  |         |          | 2B  | P | 0.82  |
|  |         |          | 3B  | S | 0.64  |
|  |         |          | 3B  | S | -1.10 |
|  |         |          | 7B  | S | 1.36  |
|  |         |          | 7B  | S | 4.85  |
|  |         |          | 7B  | S | -3.20 |
|  |         |          | 9B  | P | 0.74  |
|  |         |          | 9B  | P | 1.89  |
|  |         |          | 11B | S | 0.55  |
|  |         |          | 11B | P | 0.68  |
|  |         |          | 11B | P | 1.91  |
|  |         |          | 13B | S | 1.43  |
|  |         |          | 13B | S | 5.23  |
|  |         |          | 13B | S | -3.75 |
|  |         |          | 17B | S | 0.69  |
|  |         |          | 17B | S | -0.90 |
|  |         |          | 19B | P | 0.84  |
|  |         |          | 20B | S | 0.61  |
|  |         |          | 20B | S | -1.04 |
|  |         |          | 23O | P | 9.44  |
|  |         |          | 23O | P | 10.31 |
|  |         |          | 23O | P | 3.60  |
|  |         |          | 24O | P | 9.40  |
|  |         |          | 24O | P | 10.34 |
|  |         |          | 24O | P | 3.67  |
|  |         |          | 25C | P | 12.55 |
|  |         |          | 25C | P | 15.26 |
|  |         |          | 25C | P | 1.34  |
|  |         |          | 26C | P | 1.58  |
|  |         |          | 26C | P | 2.06  |
|  |         |          |     |   |       |
|  | HOMO-22 | Mulliken | 1B  | P | 0.61  |
|  |         |          | 1B  | P | 0.51  |
|  |         |          | 2B  | P | 1.36  |
|  |         |          | 3B  | P | 0.61  |
|  |         |          | 5B  | P | 1.57  |
|  |         |          | 5B  | P | 0.78  |
|  |         |          | 7B  | S | 2.13  |
|  |         |          | 7B  | S | 6.55  |
|  |         |          | 7B  | S | -1.31 |
|  |         |          | 7B  | P | 0.59  |

|  |  |  |     |   |       |
|--|--|--|-----|---|-------|
|  |  |  | 7B  | P | -0.89 |
|  |  |  | 7B  | P | 0.61  |
|  |  |  | 8H  | S | 0.82  |
|  |  |  | 8H  | S | 2.10  |
|  |  |  | 8H  | S | 1.02  |
|  |  |  | 9B  | S | 1.78  |
|  |  |  | 9B  | S | 4.71  |
|  |  |  | 9B  | P | 0.65  |
|  |  |  | 10H | S | 0.61  |
|  |  |  | 10H | S | 1.56  |
|  |  |  | 10H | S | 0.71  |
|  |  |  | 11B | S | 2.02  |
|  |  |  | 11B | S | 5.58  |
|  |  |  | 11B | S | -0.71 |
|  |  |  | 11B | P | 0.64  |
|  |  |  | 11B | P | -0.78 |
|  |  |  | 12H | S | 0.85  |
|  |  |  | 12H | S | 2.12  |
|  |  |  | 12H | S | 1.00  |
|  |  |  | 13B | S | 1.90  |
|  |  |  | 13B | S | 5.74  |
|  |  |  | 13B | S | -0.95 |
|  |  |  | 13B | P | 0.61  |
|  |  |  | 13B | P | -0.67 |
|  |  |  | 13B | P | 0.58  |
|  |  |  | 14H | S | 0.62  |
|  |  |  | 14H | S | 1.64  |
|  |  |  | 14H | S | 0.77  |
|  |  |  | 15B | P | 1.57  |
|  |  |  | 15B | P | 0.78  |
|  |  |  | 17B | P | 0.62  |
|  |  |  | 17B | P | 0.52  |
|  |  |  | 19B | P | 1.36  |
|  |  |  | 20B | P | 0.60  |
|  |  |  | 23O | P | 2.03  |
|  |  |  | 23O | P | 1.99  |
|  |  |  | 23O | P | 0.56  |
|  |  |  | 24O | P | 2.06  |
|  |  |  | 24O | P | 2.02  |
|  |  |  | 24O | P | 0.57  |
|  |  |  | 25C | P | 2.34  |

|  |         |                |     |   |       |
|--|---------|----------------|-----|---|-------|
|  |         |                | 25C | P | 2.26  |
|  |         |                | 26C | P | 0.56  |
|  |         |                | 27C | P | 1.19  |
|  |         |                | 27C | P | 1.60  |
|  |         |                | 27C | P | 0.57  |
|  |         |                | 28C | P | 1.19  |
|  |         |                | 28C | P | 1.60  |
|  |         |                | 28C | P | 0.57  |
|  |         |                | 29C | P | 2.11  |
|  |         |                | 29C | P | 2.78  |
|  |         |                | 29C | P | 1.29  |
|  |         |                | 30C | P | 2.11  |
|  |         |                | 30C | P | 2.78  |
|  |         |                | 30C | P | 1.29  |
|  |         |                | 31C | P | 2.55  |
|  |         |                | 31C | P | 3.35  |
|  |         |                | 31C | P | 1.44  |
|  |         |                |     |   |       |
|  | HOMO-22 | Stout-Politzer | 2B  | P | 1.12  |
|  |         |                | 5B  | P | 1.42  |
|  |         |                | 7B  | S | 1.61  |
|  |         |                | 7B  | S | 9.51  |
|  |         |                | 7B  | S | -1.34 |
|  |         |                | 8H  | S | 1.76  |
|  |         |                | 8H  | S | 0.56  |
|  |         |                | 9B  | S | 1.25  |
|  |         |                | 9B  | S | 6.84  |
|  |         |                | 10H | S | 1.21  |
|  |         |                | 11B | S | 1.31  |
|  |         |                | 11B | S | 7.72  |
|  |         |                | 12H | S | 1.63  |
|  |         |                | 13B | S | 1.54  |
|  |         |                | 13B | S | 8.74  |
|  |         |                | 13B | S | -1.06 |
|  |         |                | 14H | S | 1.39  |
|  |         |                | 15B | P | 1.44  |
|  |         |                | 19B | P | 1.10  |
|  |         |                | 23O | P | 2.25  |
|  |         |                | 23O | P | 2.10  |
|  |         |                | 24O | P | 2.29  |
|  |         |                | 24O | P | 2.16  |



|  |  |  |     |   |      |
|--|--|--|-----|---|------|
|  |  |  | 25C | P | 2.66 |
|  |  |  | 25C | P | 2.40 |
|  |  |  | 26C | P | 0.62 |
|  |  |  | 27C | P | 1.35 |
|  |  |  | 27C | P | 1.80 |
|  |  |  | 28C | P | 1.34 |
|  |  |  | 28C | P | 1.77 |
|  |  |  | 29C | P | 2.43 |
|  |  |  | 29C | P | 3.20 |
|  |  |  | 29C | P | 0.88 |
|  |  |  | 30C | P | 2.43 |
|  |  |  | 30C | P | 3.17 |
|  |  |  | 30C | P | 0.86 |
|  |  |  | 31C | P | 2.96 |
|  |  |  | 31C | P | 3.92 |
|  |  |  | 31C | P | 0.96 |

**Table S6.** Composition of selected occupied orbitals in  $[1,2\text{-B}_{12}\text{H}_{10}\text{O}_2\text{CR}]^-$

| Bond type                                                                    | Length | $\rho(r)$ | $\nabla^2\rho(r)$ | $G(r)$ | $V(r)$ | $ V(r) /G(r)$ | $H(r)$ | $\delta$ |
|------------------------------------------------------------------------------|--------|-----------|-------------------|--------|--------|---------------|--------|----------|
| <b><math>[1,2\text{-B}_{12}\text{H}_{10}\text{O}_2\text{CCH}_3]^-</math></b> |        |           |                   |        |        |               |        |          |
| C25–O24                                                                      | 1.270  | 0.371     | –0.527            | 0.516  | –1.164 | 2.255         | –0.648 | 1.016    |
| C25–O23                                                                      | 1.270  | 0.371     | –0.535            | 0.514  | –1.163 | 2.260         | –0.648 | 1.012    |
| B2–O24                                                                       | 1.535  | 0.128     | 0.547             | 0.226  | –0.316 | 1.394         | –0.090 | 0.481    |
| B19–O23                                                                      | 1.532  | 0.140     | –0.190            | 0.043  | –0.134 | 1.395         | –0.089 | 0.482    |
| B2–B19                                                                       | 1.709  | 0.124     | –0.146            | 0.044  | –0.124 | 3.104         | –0.091 | 0.572    |
| B2–B1                                                                        | 1.746  | 0.124     | –0.145            | 0.044  | –0.124 | 2.835         | –0.080 | 0.542    |
| B2–B3                                                                        | 1.747  | 0.124     | –0.147            | 0.044  | –0.124 | 2.830         | –0.080 | 0.542    |
| B19–B17                                                                      | 1.745  | 0.124     | –0.147            | 0.044  | –0.124 | 2.838         | –0.081 | 0.542    |
| B19–B20                                                                      | 1.745  | 0.128     | 0.547             | 0.226  | –0.316 | 2.838         | –0.081 | 0.542    |
| B2–B9                                                                        | 1.757  | 0.126     | –0.136            | 0.044  | –0.121 | 2.776         | –0.078 | 0.472    |
| B2–B11                                                                       | 1.757  | 0.126     | –0.136            | 0.044  | –0.121 | 2.778         | –0.078 | 0.474    |
| B19–B9                                                                       | 1.758  | 0.127     | –0.137            | 0.044  | –0.122 | 2.783         | –0.078 | 0.474    |
| B19–B11                                                                      | 1.757  | 0.126     | –0.136            | 0.044  | –0.121 | 2.778         | –0.078 | 0.473    |
| B9–B1                                                                        | 1.778  | 0.120     | –0.118            | 0.039  | –0.107 | 2.759         | –0.068 | 0.438    |
| B9–B17                                                                       | 1.780  | 0.119     | –0.117            | 0.039  | –0.107 | 2.754         | –0.068 | 0.436    |
| B11–B3                                                                       | 1.780  | 0.119     | –0.117            | 0.039  | –0.107 | 2.758         | –0.068 | 0.437    |
| B11–B20                                                                      | 1.779  | 0.120     | –0.117            | 0.039  | –0.107 | 2.756         | –0.068 | 0.437    |
| B9–B7                                                                        | 1.743  | 0.124     | –0.145            | 0.040  | –0.116 | 2.914         | –0.076 | 0.514    |
| B11–B13                                                                      | 1.744  | 0.124     | –0.144            | 0.040  | –0.115 | 2.911         | –0.076 | 0.512    |
| B1–B3                                                                        | 1.801  | 0.116     | –0.106            | 0.037  | –0.100 | 2.715         | –0.063 | 0.403    |

|                                                                                               |       |       |        |       |        |       |        |       |
|-----------------------------------------------------------------------------------------------|-------|-------|--------|-------|--------|-------|--------|-------|
| B17–B20                                                                                       | 1.802 | 0.116 | –0.105 | 0.037 | –0.100 | 2.710 | –0.063 | 0.402 |
| B1–B5                                                                                         | 1.775 | 0.119 | –0.124 | 0.037 | –0.106 | 2.830 | –0.068 | 0.476 |
| B3–B5                                                                                         | 1.776 | 0.119 | –0.124 | 0.037 | –0.105 | 2.829 | –0.068 | 0.476 |
| B17–B15                                                                                       | 1.776 | 0.119 | –0.124 | 0.037 | –0.106 | 2.830 | –0.068 | 0.476 |
| B20–B15                                                                                       | 1.776 | 0.119 | –0.124 | 0.037 | –0.105 | 2.829 | –0.068 | 0.475 |
| B1–B7                                                                                         | 1.793 | 0.117 | –0.109 | 0.038 | –0.103 | 2.726 | –0.065 | 0.435 |
| B3–B13                                                                                        | 1.793 | 0.117 | –0.109 | 0.038 | –0.102 | 2.729 | –0.065 | 0.436 |
| B17–B7                                                                                        | 1.793 | 0.117 | –0.110 | 0.038 | –0.103 | 2.728 | –0.065 | 0.437 |
| B20–B13                                                                                       | 1.793 | 0.117 | –0.110 | 0.038 | –0.103 | 2.729 | –0.065 | 0.437 |
| B5–B7                                                                                         | 1.778 | 0.119 | –0.124 | 0.037 | –0.105 | 2.838 | –0.068 | 0.466 |
| B5–B13                                                                                        | 1.778 | 0.119 | –0.123 | 0.037 | –0.104 | 2.839 | –0.068 | 0.466 |
| B15–B7                                                                                        | 1.778 | 0.119 | –0.123 | 0.037 | –0.104 | 2.835 | –0.068 | 0.467 |
| B15–B13                                                                                       | 1.779 | 0.119 | –0.123 | 0.037 | –0.104 | 2.835 | –0.068 | 0.465 |
| B5–B15                                                                                        | 1.788 | 0.117 | –0.116 | 0.037 | –0.103 | 2.790 | –0.066 | 0.451 |
| <b>[1.2–B<sub>12</sub>H<sub>10</sub>O<sub>2</sub>CC<sub>6</sub>H<sub>5</sub>]<sup>–</sup></b> |       |       |        |       |        |       |        |       |
| C25–O24                                                                                       | 1.271 | 0.370 | –0.540 | 0.511 | –1.157 | 2.264 | –0.646 | 1.007 |
| C25–O23                                                                                       | 1.272 | 0.370 | –0.541 | 0.510 | –1.155 | 2.265 | –0.645 | 1.005 |
| B2–O24                                                                                        | 1.534 | 0.128 | 0.554  | 0.227 | –0.315 | 1.390 | –0.089 | 0.480 |
| B19–O23                                                                                       | 1.531 | 0.129 | 0.561  | 0.229 | –0.318 | 1.389 | –0.089 | 0.481 |
| B2–B19                                                                                        | 1.708 | 0.140 | –0.191 | 0.043 | –0.134 | 3.109 | –0.091 | 0.573 |
| B2–B1                                                                                         | 1.746 | 0.124 | –0.147 | 0.044 | –0.124 | 2.835 | –0.080 | 0.542 |
| B2–B3                                                                                         | 1.746 | 0.124 | –0.147 | 0.044 | –0.125 | 2.838 | –0.081 | 0.543 |
| B19–B17                                                                                       | 1.745 | 0.124 | –0.147 | 0.044 | –0.124 | 2.839 | –0.081 | 0.542 |
| B19–B20                                                                                       | 1.746 | 0.124 | –0.146 | 0.044 | –0.124 | 2.834 | –0.080 | 0.542 |
| B2–B9                                                                                         | 1.758 | 0.126 | –0.136 | 0.044 | –0.122 | 2.774 | –0.078 | 0.472 |
| B2–B11                                                                                        | 1.756 | 0.126 | –0.136 | 0.044 | –0.122 | 2.775 | –0.078 | 0.473 |
| B19–B9                                                                                        | 1.758 | 0.126 | –0.135 | 0.044 | –0.122 | 2.771 | –0.078 | 0.470 |
| B19–B11                                                                                       | 1.757 | 0.126 | –0.136 | 0.044 | –0.122 | 2.775 | –0.078 | 0.472 |
| B9–B1                                                                                         | 1.780 | 0.119 | –0.117 | 0.039 | –0.107 | 2.756 | –0.068 | 0.435 |
| B9–B17                                                                                        | 1.780 | 0.120 | –0.118 | 0.039 | –0.107 | 2.758 | –0.068 | 0.436 |
| B11–B3                                                                                        | 1.781 | 0.119 | –0.117 | 0.039 | –0.107 | 2.753 | –0.068 | 0.435 |
| B11–B20                                                                                       | 1.780 | 0.119 | –0.117 | 0.039 | –0.107 | 2.755 | –0.068 | 0.436 |
| B9–B7                                                                                         | 1.743 | 0.124 | –0.145 | 0.040 | –0.116 | 2.912 | –0.076 | 0.513 |
| B11–B13                                                                                       | 1.744 | 0.124 | –0.144 | 0.040 | –0.115 | 2.909 | –0.076 | 0.512 |
| B1–B3                                                                                         | 1.802 | 0.116 | –0.106 | 0.037 | –0.100 | 2.713 | –0.063 | 0.402 |
| B17–B20                                                                                       | 1.801 | 0.116 | –0.106 | 0.037 | –0.100 | 2.713 | –0.063 | 0.402 |
| B1–B5                                                                                         | 1.776 | 0.119 | –0.124 | 0.037 | –0.105 | 2.831 | –0.068 | 0.475 |
| B3–B5                                                                                         | 1.776 | 0.119 | –0.124 | 0.037 | –0.105 | 2.830 | –0.068 | 0.474 |
| B17–B15                                                                                       | 1.776 | 0.119 | –0.124 | 0.037 | –0.106 | 2.831 | –0.068 | 0.475 |
| B20–B15                                                                                       | 1.775 | 0.119 | –0.124 | 0.037 | –0.106 | 2.830 | –0.068 | 0.476 |
| B1–B7                                                                                         | 1.793 | 0.117 | –0.109 | 0.038 | –0.102 | 2.726 | –0.065 | 0.437 |

|                                       |       |       |        |       |        |       |        |       |
|---------------------------------------|-------|-------|--------|-------|--------|-------|--------|-------|
| B3–B13                                | 1.793 | 0.117 | –0.110 | 0.038 | –0.102 | 2.731 | –0.065 | 0.437 |
| B17–B7                                | 1.793 | 0.117 | –0.109 | 0.038 | –0.102 | 2.726 | –0.065 | 0.436 |
| B20–B13                               | 1.793 | 0.117 | –0.109 | 0.038 | –0.103 | 2.728 | –0.065 | 0.437 |
| B5–B7                                 | 1.779 | 0.119 | –0.123 | 0.037 | –0.104 | 2.838 | –0.068 | 0.466 |
| B5–B13                                | 1.779 | 0.119 | –0.123 | 0.037 | –0.104 | 2.835 | –0.067 | 0.465 |
| B15–B7                                | 1.778 | 0.119 | –0.123 | 0.037 | –0.104 | 2.837 | –0.068 | 0.466 |
| B15–B13                               | 1.779 | 0.119 | –0.123 | 0.037 | –0.104 | 2.835 | –0.068 | 0.466 |
| B5–B15                                | 1.788 | 0.117 | –0.116 | 0.037 | –0.103 | 2.788 | –0.066 | 0.451 |
| <b>CH<sub>3</sub>COOH</b>             |       |       |        |       |        |       |        |       |
| C4–O2                                 | 1.347 | 0.308 | –0.684 | 0.320 | –0.811 | 2.534 | –0.491 | 0.843 |
| C4–O3                                 | 1.200 | 0.436 | –0.162 | 0.762 | –1.564 | 2.053 | –0.802 | 1.264 |
| <b>C<sub>6</sub>H<sub>5</sub>COOH</b> |       |       |        |       |        |       |        |       |
| C12–O14                               | 1.346 | 0.310 | –0.681 | 0.324 | –0.818 | 2.526 | –0.494 | 0.841 |
| C12–O13                               | 1.203 | 0.434 | –0.196 | 0.748 | –1.545 | 2.065 | –0.797 | 1.245 |

**Table S7.** Topological parameters of electron density at bond critical points (BCPs) of [1,2-B<sub>12</sub>H<sub>10</sub>O<sub>2</sub>CR]<sup>–</sup> and RCOOH.  $\nabla^2\rho(r)$  – Laplacian of electron density at BCPs;  $G(r)$  – Lagrangian kinetic energy at BCPs;  $H(r)$  – total energy at BCPs;  $\delta$  – delocalisation index.

| Model structure                       | Atom | x         | y         | z         |
|---------------------------------------|------|-----------|-----------|-----------|
| <b>CH<sub>3</sub>COOH</b>             |      |           |           |           |
|                                       | H    | 10.515734 | 15.155856 | 28.516072 |
|                                       | O    | 10.551744 | 14.663517 | 29.343318 |
|                                       | O    | 10.267593 | 16.734228 | 30.125868 |
|                                       | C    | 10.407553 | 15.561566 | 30.337409 |
|                                       | C    | 10.447557 | 14.909604 | 31.686713 |
|                                       | H    | 11.396205 | 14.389039 | 31.813837 |
|                                       | H    | 10.327353 | 15.663272 | 32.458004 |
|                                       | H    | 9.653903  | 14.166936 | 31.761498 |
|                                       | H    | 10.515734 | 15.155856 | 28.516072 |
| <b>C<sub>6</sub>H<sub>5</sub>COOH</b> |      |           |           |           |
|                                       | C    | 26.580921 | 18.918706 | 27.434950 |
|                                       | C    | 25.308225 | 18.430536 | 27.696538 |
|                                       | C    | 27.425674 | 19.241252 | 28.482202 |
|                                       | H    | 24.647027 | 18.177828 | 26.877129 |
|                                       | H    | 28.421534 | 19.623577 | 28.301970 |
|                                       | C    | 24.880429 | 18.265964 | 29.005850 |
|                                       | C    | 26.999919 | 19.074612 | 29.795681 |
|                                       | H    | 23.887037 | 17.887356 | 29.208772 |

|                                                                                   |   |           |           |           |
|-----------------------------------------------------------------------------------|---|-----------|-----------|-----------|
|                                                                                   | C | 25.723835 | 18.586334 | 30.056787 |
|                                                                                   | H | 25.397230 | 18.459253 | 31.079355 |
|                                                                                   | H | 26.913567 | 19.047688 | 26.413210 |
|                                                                                   | C | 27.945575 | 19.431003 | 30.886911 |
|                                                                                   | O | 29.052629 | 19.870577 | 30.720796 |
|                                                                                   | O | 27.442072 | 19.212914 | 32.115651 |
|                                                                                   | H | 28.125951 | 19.473446 | 32.741121 |
|                                                                                   |   |           |           |           |
| <b>[1,2-B<sub>12</sub>H<sub>10</sub>O<sub>2</sub>CCH<sub>3</sub>]<sup>-</sup></b> | B | 9.009119  | 11.269517 | 21.023174 |
|                                                                                   | B | 9.568366  | 9.715777  | 20.455800 |
|                                                                                   | B | 8.802501  | 10.780221 | 19.301516 |
|                                                                                   | H | 7.724457  | 10.578192 | 18.828005 |
|                                                                                   | B | 9.406267  | 12.398973 | 19.712447 |
|                                                                                   | H | 8.748909  | 13.376774 | 19.515482 |
|                                                                                   | B | 10.481600 | 12.287900 | 21.123640 |
|                                                                                   | H | 10.567567 | 13.169118 | 21.926093 |
|                                                                                   | B | 10.558724 | 10.612403 | 21.597459 |
|                                                                                   | H | 10.697972 | 10.166058 | 22.701448 |
|                                                                                   | B | 10.227714 | 9.824386  | 18.830733 |
|                                                                                   | H | 10.150389 | 8.863575  | 18.117984 |
|                                                                                   | B | 10.151522 | 11.504360 | 18.368090 |
|                                                                                   | H | 10.008617 | 11.834696 | 17.228803 |
|                                                                                   | B | 11.180225 | 12.420228 | 19.493672 |
|                                                                                   | H | 11.748288 | 13.411083 | 19.143602 |
|                                                                                   | B | 11.908756 | 11.304054 | 20.666734 |
|                                                                                   | H | 12.989309 | 11.463251 | 21.150827 |
|                                                                                   | B | 11.264034 | 9.737533  | 20.247150 |
|                                                                                   | B | 11.702286 | 10.813723 | 18.944760 |
|                                                                                   | H | 12.637635 | 10.633366 | 18.223367 |
|                                                                                   | H | 8.075422  | 11.408794 | 21.755668 |
|                                                                                   | O | 11.589544 | 8.290012  | 20.628484 |
|                                                                                   | O | 9.384438  | 8.258028  | 20.898761 |
|                                                                                   | C | 10.516959 | 7.685176  | 20.940331 |
|                                                                                   | C | 10.601946 | 6.270234  | 21.392267 |
|                                                                                   | H | 11.237724 | 5.706810  | 20.712203 |

|                                                                                               |   |           |           |           |
|-----------------------------------------------------------------------------------------------|---|-----------|-----------|-----------|
|                                                                                               | H | 9.611304  | 5.830004  | 21.447703 |
|                                                                                               | H | 11.065949 | 6.252894  | 22.378863 |
|                                                                                               |   |           |           |           |
| <b>[1,2-B<sub>12</sub>H<sub>10</sub>O<sub>2</sub>CC<sub>6</sub>H<sub>5</sub>]<sup>-</sup></b> | B | 8.732650  | 11.129533 | 20.595041 |
|                                                                                               | B | 9.556548  | 9.627318  | 20.259804 |
|                                                                                               | B | 9.079171  | 10.616375 | 18.902934 |
|                                                                                               | H | 8.206958  | 10.321041 | 18.141800 |
|                                                                                               | B | 9.404979  | 12.283108 | 19.423699 |
|                                                                                               | H | 8.758918  | 13.199702 | 19.012299 |
|                                                                                               | B | 10.025979 | 12.268510 | 21.090282 |
|                                                                                               | H | 9.806680  | 13.158232 | 21.856625 |
|                                                                                               | B | 10.094806 | 10.607892 | 21.615374 |
|                                                                                               | H | 9.944287  | 10.181284 | 22.724801 |
|                                                                                               | B | 10.651853 | 9.781639  | 18.895483 |
|                                                                                               | H | 10.861781 | 8.811371  | 18.224429 |
|                                                                                               | B | 10.580437 | 11.447019 | 18.382233 |
|                                                                                               | H | 10.749780 | 11.759638 | 17.241733 |
|                                                                                               | B | 11.158182 | 12.451680 | 19.731276 |
|                                                                                               | H | 11.722087 | 13.485832 | 19.532958 |
|                                                                                               | B | 11.598448 | 11.406418 | 21.097366 |
|                                                                                               | H | 12.472350 | 11.661214 | 21.871146 |
|                                                                                               | B | 11.231658 | 9.788860  | 20.554314 |
|                                                                                               | B | 11.944751 | 10.893900 | 19.405482 |
|                                                                                               | H | 13.061876 | 10.791919 | 18.994653 |
|                                                                                               | H | 7.617679  | 11.190672 | 21.019534 |
|                                                                                               | O | 11.543496 | 8.375556  | 21.053473 |
|                                                                                               | O | 9.365539  | 8.161148  | 20.667791 |
|                                                                                               | C | 10.478111 | 7.681466  | 21.052571 |
|                                                                                               | C | 10.535746 | 6.283639  | 21.519031 |
|                                                                                               | C | 9.382684  | 5.506470  | 21.528757 |
|                                                                                               | C | 11.743504 | 5.752651  | 21.958632 |
|                                                                                               | C | 9.440442  | 4.198611  | 21.978515 |
|                                                                                               | C | 11.795237 | 4.444685  | 22.408115 |
|                                                                                               | C | 10.645134 | 3.667994  | 22.417892 |
|                                                                                               | H | 8.453238  | 5.936953  | 21.182143 |

|  |   |           |          |           |
|--|---|-----------|----------|-----------|
|  | H | 12.628837 | 6.373305 | 21.944520 |
|  | H | 8.543486  | 3.592726 | 21.987742 |
|  | H | 12.733591 | 4.031198 | 22.754755 |
|  | H | 10.687489 | 2.644580 | 22.769793 |

**Table S8.** Cartesian atomic coordinates of the calculated optimized model structures. All coordinates are given in Angstrom units, Å.
